# Supplementary material for: Development and validation of a nomogram to predict postoperative pulmonary complications following thoracoscopic surgery
Source: PeerJ. 2021 Nov 4;9:e12366. doi: 10.7717/peerj.12366 (PMC8572520; doi:10.7717/peerj.12366)
Supplement: Supplemental Information 1 [file peerj-09-12366-s001.xlsx]

## Sheet: 1Yes0No
Types_of_operation	Age	Sex	ASA	MAP	Duration_of_operation	Airway_management	Duration_of_one_lung_ventilation	BMI	History_of_hypertension	History_of_diabetes_mellitus	History_of_stroke	History_of_heart_disease	History_of_COPD	History_of_smoking	History_of_alcohol_use	Leukocyte_counts	Red_blood_cell_counts	Platelet_counts	Aspartate_aminotransferase	Alanine_aminotransferase	Blood_glucose	Blood_creatinine	Blood_urea_nitrogen	Serum_sodium	Serum_potassium	Serum_albumin	PPCs
7	74	1	3	89.649	505	2	185	19.2672	1	0	1	1	0	1	0	6.16	4.62	135	29	35	4.96	75	6.88	142.3	4.17	38.7	1
3	67	1	2	95.976	175	2	151	26.3465	1	0	0	0	0	0	0	7.37	4.5	202	28	30	4.61	55	4.08	143.2	4.02	37.1	0
5	69	1	2	97.645	180	2	82	18.6851	0	0	0	0	1	1	0	6.12	3.77	284	12	19	5.67	68	7.13	147.4	4.51	28.6	1
7	66	1	2	83.65	442	3	110	19.5717	1	0	0	0	0	1	0	6.59	4.53	213	22	21	4.67	55	6.48	139.4	4.22	44.2	1
7	70	0	2	103.968	445	3	207	30.4832	0	0	0	0	0	0	0	5.44	4.35	214	14	18	4.66	60	5.41	142.1	4.05	40.3	1
1	47	1	3	110.31	120	3	77	20.7612	0	0	0	0	1	1	0	10.56	4.54	267	32	29	4.29	64	3.97	139	3.98	39.4	1
2	53	1	1	115.984	290	2	154	25.7117	0	0	0	0	0	0	0	7.94	5.01	428	15	15	5.2	70	4.52	141.5	4.13	40.4	0
2	59	1	2	106.645	164	2	117	25.528	1	0	0	0	0	1	0	5.48	4.73	173	14	19	6.44	96	6.83	141.2	3.66	45	0
5	16	1	2	102.978	91	3	66	24.5675	0	0	0	0	0	0	0	4.71	4.83	224	11	18	5.23	67	3.9	141.2	4.5	44.3	0
1	65	0	2	97.974	96	3	78	21.8314	0	1	0	0	0	0	0	3.87	4.22	92	8	21	9.5	33	4.95	141.4	3.88	37.4	0
3	32	1	3	111.647	275	2	122	21.6197	1	0	0	0	1	0	0	7.11	5.48	285	37	23	4.96	62	4.13	142.9	3.96	40.9	0
3	74	1	2	91.306	228	3	206	27.0993	0	0	0	0	0	0	0	6.03	4.777	117	22	21	5.57	64	6.12	138.7	4.05	36.1	0
7	61	1	2	85.981	305	2	51	24.4956	0	0	0	0	0	0	0	5.32	3.98	161	16	18	5.41	61	5.3	140.3	4.2	31.8	0
7	47	1	2	112.318	354	3	118	25.5593	0	0	0	0	0	1	0	6.46	5.66	176	77	55	4.94	34	6.36	139.5	4.49	43.3	1
5	19	1	1	101.308	104	3	45	16.9796	0	0	0	0	0	0	0	4.34	5.23	258	14	17	4.51	65	4.78	142.9	3.96	42.3	0
1	64	0	2	109.636	80	2	60	23.533	0	0	0	0	0	0	0	3.27	4.13	176	19	23	5.11	59	4.54	143.4	3.96	43.9	0
1	80	0	4	103.634	175	3	109	21.9289	0	1	1	0	0	1	0	7.78	3.65	304	11	11	6.26	41	3.45	141.4	3.37	31.2	1
6	59	1	2	101.985	135	3	77	25.7276	0	0	0	1	0	0	0	6.87	4.33	206	43	26	5.45	52	4.99	143.1	3.54	38.4	0
6	42	1	2	128.311	244	2	201	26.7755	1	0	0	0	0	0	0	7.23	5.16	158	27	22	5.33	73	3.97	139.9	3.95	47.1	0
3	67	1	2	110.974	154	3	100	23.6203	1	0	0	0	0	1	0	10.37	3.89	219	10	16	5.08	83	8.61	140.5	3.58	35.8	0
7	56	0	2	84.65	379	3	158	19.9792	0	0	0	0	0	1	1	5.1	3.69	201	12	19	4.75	45	3.05	143	3.91	36.5	1
3	65	0	2	100.646	215	2	110	26.5625	0	1	0	0	0	0	0	4.6	4.1	207	11	14	5.54	54	3.15	144.8	3.65	36.9	0
7	61	0	2	112.643	304	3	86	24.6097	1	0	0	1	0	1	1	6.85	4.72	193	14	15	5.33	59	7.65	140.7	5	4.26	1
1	40	1	2	94.985	200	2	143	28.5467	0	0	0	0	0	1	0	5.97	4.53	148	47	40	4.46	84	6.74	140.9	4.03	42.1	1
1	69	1	2	115.974	30	1	15	23.1837	0	0	0	1	0	0	0	3.63	4.24	92	22	21	6.13	60	2.98	142	3.78	38.6	0
6	54	0	2	124.978	75	1	45	22.8659	1	0	0	0	0	0	0	4.7	4.29	133	26	30	4.69	41	4.75	143	4.2	42.8	0
3	55	0	2	80.645	173	3	129	17.6471	0	0	0	0	0	0	0	6.95	3.26	281	16	18	4.4	69	3.62	141.3	4.65	34.5	0
5	18	1	1	83.981	100	3	72	19.1358	0	0	0	0	0	0	0	6.71	5.35	266	11	16	5	75	3.47	141.8	3.93	44.1	0
7	66	1	2	98.967	307	2	189	17.6471	0	0	0	0	0	1	0	5.21	4.02	158	17	20	4.36	71	5.53	142.4	3.46	41.1	0
3	66	1	2	106.641	202	2	155	20.2449	1	0	0	0	0	0	0	5.48	4.17	90	96	51	5.13	84	5.95	143.2	4.17	40.2	0
1	20	1	1	100.653	34	3	20	16.4121	0	0	0	0	0	0	0	8.97	5.13	258	22	18	3.99	89	5.25	140.7	3.91	46.1	0
1	41	0	2	81.323	64	3	38	18.9453	0	0	0	0	0	0	0	7.52	4.25	108	22	26	4.28	41	5.23	140	4.24	41.5	0
3	76	1	3	94.974	155	2	135	20.9644	1	1	0	0	0	0	0	8.74	4.2	244	18	16	8.35	69	4.73	140.3	3.88	33.2	0
1	60	0	2	97.317	107	2	72	25.2994	0	0	0	0	0	0	0	5.7	4.2	266	21	24	4.95	39	4.07	140.8	4.18	43.3	0
3	64	1	2	122.316	120	3	77	27.5482	1	0	0	0	0	1	1	5.25	4.71	197	20	21	5.55	52	4.23	142.1	4.23	44.1	0
1	62	1	2	109.318	80	2	68	17.782	0	0	0	0	0	0	0	8.78	4.94	208	29	33	4.4	84	5.54	143.3	4.31	43.3	0
1	75	1	3	105.647	142	2	90	19.1327	1	0	0	0	0	1	0	11.77	3.72	329	10	18	5.92	62	4.34	139.9	3.92	30.7	1
3	51	0	1	94.65	133	2	123	21.7865	0	0	0	0	0	0	0	4.56	4.07	166	15	20	4.95	44	6.41	144.5	3.77	43.3	0
3	67	0	2	80.316	206	2	115	29.2421	0	0	0	0	0	0	0	3.64	3.78	132	14	21	4.66	42	4.55	144.3	3.53	38.8	0
1	18	1	1	108.653	105	3	87	18.6122	0	0	0	0	0	1	0	7.38	4.97	181	11	14	5.17	80	5.26	144.7	4.22	46.7	0
3	43	1	2	97.654	226	2	166	20.0796	0	0	0	0	0	0	0	5.88	5.11	198	21	19	5.42	62	6	141.3	3.28	40.1	0
3	44	0	2	91.653	155	2	79	24.4444	0	0	0	0	0	0	0	4.3	4.39	210	45	36	5.48	30	4.34	141.1	4.19	39.8	0
1	61	0	3	106.974	98	3	60	22.8374	1	1	1	1	0	1	0	8.52	4.95	245	24	19	6.49	46	4.13	139	3.72	38.6	1
3	57	1	2	109.314	187	3	137	23.6713	1	0	0	0	0	0	0	7.63	4.82	219	32	27	5.06	91	5.73	141.6	4	43.9	0
3	79	1	3	95.64	140	2	87	17.4081	0	0	0	1	0	1	0	4.12	3.88	172	9	11	4.5	80	3.94	144.3	3.31	33.8	1
1	49	1	2	91.31	90	3	65	26.6436	0	0	0	0	0	0	0	6.49	4.69	188	37	25	4.51	65	4.68	140.8	3.33	38.9	0
7	67	1	2	109.31	352	3	75	24.3827	1	0	0	1	0	1	1	4.14	4.55	192	21	22	5.47	73	7.87	143	4.11	38.7	0
3	74	0	2	105.298	170	2	117	28.0612	1	0	0	0	0	0	0	4.76	4.08	107	19	30	5.48	53	5.69	142.7	3.52	37	0
3	68	1	3	100.651	207	2	138	18.75	0	0	0	0	0	1	0	4.88	4.57	204	17	22	4.29	40	4.32	141.4	4.39	34.6	1
7	70	0	2	109.974	355	3	226	22.0604	1	0	0	0	0	0	0	4.15	4.01	165	17	31	6.21	50	4.06	144.7	4.05	32.3	0
1	23	0	1	97.313	65	2	40	15.8079	0	0	0	0	0	0	0	6.52	4.29	110	9	15	4.55	52	2.7	138.3	3.62	39.5	0
1	51	0	1	90.317	115	2	78	20.1733	0	0	0	0	0	0	0	5.43	5.1	163	43	54	4.54	46	5.81	143.8	4.13	39.7	0
3	71	1	2	76.317	134	2	80	23.0469	1	0	0	0	0	1	0	6.89	4.38	188	8	15	4.55	99	8.52	142.7	4.18	39.1	0
3	65	1	3	117.645	141	2	70	26.079	0	0	0	0	0	1	1	6.26	5.18	193	16	20	5.15	87	5.31	141.7	4.67	44.1	1
3	49	1	2	95.982	171	2	109	20.9366	0	0	0	0	0	1	1	7.15	4.9	214	54	31	4.59	71	6.88	141	4.11	45.4	0
1	39	1	2	82.648	50	3	29	25.6373	1	0	0	0	0	0	0	6.48	4.94	252	46	35	5.22	57	3.87	140.1	4.44	43.1	0
3	66	1	2	99.637	110	3	66	18.6012	0	0	0	0	0	0	0	6.06	4.3	174	9	16	3.82	39	5.74	139.6	4.18	36	0
6	54	0	2	88.982	160	3	105	20.5693	0	0	0	0	0	0	0	5.59	4.04	264	19	24	5.35	49	3.72	142.1	4.07	41.1	0
7	65	1	2	87.64	430	2	208	17.9592	0	0	0	0	0	1	0	5.93	3.62	99	22	21	4.81	70	8.14	144.8	3.96	34	0
1	24	1	1	81.32	61	3	33	16.358	0	0	0	0	0	0	0	5.87	4.45	198	16	23	4.14	71	3.68	141.3	3.95	38.5	0
3	62	0	2	108.312	111	2	74	26.6389	0	0	0	0	0	0	0	7.88	4.16	256	14	18	4.6	73	11.39	142.3	3.73	38.8	0
7	66	1	2	103.982	318	2	152	16.7062	0	0	0	0	0	0	0	4.83	3.89	242	14	17	4.12	80	3.57	143.3	4.19	35.4	0
6	24	1	2	92.98	121	3	105	22.4913	0	0	1	0	0	0	0	8.2	4.46	223	10	11	5	76	6.7	144.7	3.98	44.1	0
1	51	0	2	88.645	106	2	55	23.4375	0	0	0	0	0	0	0	4.19	4.58	257	9	14	5.11	43	6.64	140.9	4.51	42.6	0
7	65	1	2	108.31	310	3	85	21.9525	0	0	0	0	0	1	1	5.3	3.98	226	26	22	4.81	64	5.42	142.3	4.27	38.9	1
7	71	1	2	95.973	337	3	146	22.4913	0	0	0	0	0	1	0	13.63	4.44	245	12	18	5.32	73	9.07	138.7	3.93	35	1
7	66	0	3	112.634	351	3	94	17.0874	0	0	0	0	0	0	0	2.73	2.81	118	9	15	4.43	60	4.01	143.6	4.01	40	1
5	69	1	2	102.643	220	2	108	24.3824	1	0	0	0	0	1	0	4.29	4.25	183	14	19	4.07	66	6.02	143	4.13	36	0
1	45	1	2	94.318	65	2	47	20.4783	0	0	0	0	0	0	0	4.94	5.14	168	24	21	4.63	65	5.51	139.5	4.36	41	0
7	73	1	2	93.982	469	3	373	15.7407	0	0	0	0	0	0	0	3.8	4.51	124	10	17	5.41	61	5.51	140.8	4.63	38.1	0
3	71	1	2	109.318	168	2	112	21.875	0	0	0	0	0	1	0	5.85	3.9	141	20	25	4.12	58	7.3	141.2	4.45	35.5	0
1	52	1	2	106.314	146	2	100	30.4688	0	0	0	0	0	1	0	12.85	4.55	309	45	26	6.63	53	6.26	140.7	4.57	43.2	0
1	54	1	2	113.648	81	2	51	29.0606	0	0	0	0	0	0	0	5.37	5.03	253	81	52	4.69	75	7	142	3.73	41.9	0
1	19	0	1	77.653	205	2	197	18.1449	0	0	0	0	0	0	0	6.62	4.19	241	15	23	4.73	37	3.12	139.1	4.01	38.5	0
4	62	1	2	116.645	145	2	82	21.8776	1	0	0	0	0	1	0	4.83	4.6	193	15	16	4.9	71	4.79	141	4.06	35.6	0
6	31	1	2	93.317	156	3	97	20.6852	0	0	0	0	0	0	0	8.59	5.23	250	33	22	4.43	75	5.12	141.5	4.6	45.7	0
6	58	0	2	118.979	126	3	46	29.4023	0	0	0	0	0	0	0	6.46	5.1	257	11	16	4.43	81	4.31	142.4	3.94	43.5	0
7	82	1	3	97.309	385	2	123	23.0469	0	1	0	1	0	0	0	4.11	3.52	118	16	20	5.67	78	6.62	144.2	4.21	40	1
1	54	1	2	101.32	96	2	56	29.0698	0	0	0	0	0	0	0	5.5	4.93	203	11	19	4.9	53	5.1	140.1	4.09	40.7	0
1	60	0	2	113.979	85	2	52	22.8928	1	0	0	0	0	0	0	6.93	4.78	252	31	31	10.34	57	7.92	140.1	3.38	40.1	0
3	71	1	2	101.315	260	2	202	26.2626	0	0	0	0	0	1	0	6.13	4.38	236	32	24	5	55	4.81	135.7	4.65	37	0
3	64	1	3	99.31	303	2	169	25.9516	1	1	0	0	0	1	0	5.11	4.03	177	15	18	3.48	133	9.75	141.5	4.43	38.6	1
1	46	1	1	96.98	53	2	18	26.4706	0	0	0	0	0	1	0	5.51	5.02	197	43	32	5	56	4.63	140.4	4.33	40	0
3	64	1	2	112.976	103	2	77	21.4533	0	0	0	0	0	0	0	3.88	4.56	181	14	17	5.08	64	4.67	144.7	3.9	41.6	0
7	73	0	3	95.64	454	3	201	21.58	0	0	0	1	0	0	0	3.55	4.04	169	14	24	4.9	54	7.91	141.4	4.06	35.8	1
3	32	0	1	99.645	168	2	133	20.1733	0	0	0	0	0	0	0	5.67	4.74	177	46	31	4.82	54	3.91	138.8	4.72	42.6	0
1	32	0	2	85.649	90	2	53	34.5473	0	0	0	0	0	0	0	5.22	3.73	205	18	17	5.57	47	6.78	139.8	4.07	36.5	0
6	25	0	1	80.314	156	2	78	23.2438	0	0	0	0	0	0	0	5.89	3.68	243	10	15	4.5	51	4.04	138.1	3.97	42.8	0
7	70	0	2	113.98	282	2	209	20.5442	0	0	0	0	0	0	0	5.64	3.65	283	28	25	4.97	48	4.72	140.2	4.52	35.5	1
3	65	1	2	92.65	198	2	118	24.281	0	0	0	0	0	0	0	12.6	4.6	299	13	17	4.66	85	13.35	140.3	3.98	43	0
6	68	1	2	110.637	65	3	35	28.257	0	0	0	0	0	1	1	6.05	4.8	218	21	27	4.96	67	5.92	139.2	4.18	36.8	0
3	60	1	2	98.318	250	2	154	23.8751	0	0	0	0	0	0	0	5.78	4.3	196	17	17	5.33	84	8.19	139.5	3.35	35.3	1
6	63	0	2	112.644	190	2	127	24.974	0	0	0	0	0	0	0	4	3.68	278	41	32	4.86	86	7.32	138.6	4.42	35.4	0
7	68	1	2	105.313	475	3	200	28.1969	0	0	0	0	0	0	0	6.69	4.3	223	12	18	4.78	62	5.07	140	4.3	36.1	0
3	44	0	2	81.986	102	2	85	20.1951	0	0	0	0	0	0	0	9.01	4.86	184	8	13	4.79	53	5.29	141.2	3.99	44.9	0
7	64	1	2	83.652	408	3	211	24.9135	0	0	0	0	0	1	0	6.86	3.11	271	13	15	5.87	76	4.08	141.8	4.07	38.2	1
3	61	0	2	107.315	176	2	104	23.7253	1	0	0	0	0	0	0	4.55	4.49	217	28	23	4.4	49	4.47	144.1	4.48	42.6	0
2	15	1	2	87.982	180	2	125	18.3391	0	0	0	0	0	0	0	8.91	4	238	13	24	4.62	42	5.12	137.3	5.04	37.9	0
2	55	0	3	106.97	147	3	109	27.6361	0	0	0	0	0	1	0	7.99	4.59	329	41	28	5.66	64	5.45	142.8	3.95	42.2	1
1	57	1	2	105.651	148	2	96	21.7993	1	0	0	0	0	0	0	6.84	4.72	211	13	17	4.61	80	5.03	140.2	4.28	36.9	0
3	58	1	2	113.315	155	3	122	23.246	0	0	0	0	0	1	0	4.51	4.78	219	22	21	5.58	62	5.42	141	4.41	41	1
2	52	0	2	84.654	125	3	91	23.5304	1	0	0	0	0	0	0	3.42	4.29	186	17	28	5	52	7.84	140.7	4.38	36	0
3	66	0	2	122.647	315	3	145	29.0318	0	0	0	0	0	0	0	4.85	4.07	192	11	16	7.41	44	6.64	140.3	3.9	37.1	0
7	70	1	2	78.32	285	3	115	23.6652	0	0	0	0	0	1	0	8.5	4.4	224	15	25	4.92	64	7.27	142.8	4.13	40.3	0
5	54	1	3	73.993	230	2	109	19.9594	0	0	0	0	1	1	0	10.62	5.03	183	14	19	5.44	77	4.34	139.5	4.61	42.8	1
1	69	1	1	91.312	142	2	80	21.875	0	0	0	0	0	0	0	3.79	4.65	149	14	21	4.57	73	5.17	141	4.8	42.9	0
2	38	0	2	79.651	235	2	203	22.2656	0	0	0	0	0	0	0	5.43	4.79	207	14	22	5.32	52	5.83	140.9	4.53	47.4	1
1	33	1	1	77.98	155	2	120	21.551	0	0	0	0	0	0	1	8.67	5.61	182	33	18	5.43	59	4.63	146.7	4.65	41.2	0
3	75	0	3	104.976	155	2	141	19.025	0	0	0	0	1	1	0	3.03	3.71	65	15	19	4.45	38	4.75	145.2	3.92	35.8	1
1	42	0	1	106.979	162	2	132	34.0192	0	0	0	0	0	0	0	4.53	4.25	167	7	12	5.25	46	5.24	140.9	4.66	41.5	0
5	30	1	1	85.981	255	2	198	21.6721	0	0	0	0	0	0	0	9.22	4.99	263	44	25	4.84	66	4.41	138.5	4.1	47.5	0
7	83	0	3	110.961	445	3	250	25.3333	0	0	0	0	0	0	0	9.74	4.79	252	17	23	6.33	58	5.84	141.2	3.9	42	1
2	84	1	3	87.307	114	2	65	27.3797	0	0	0	1	0	0	0	4.16	4.65	177	32	32	6.2	74	6.8	142.2	4.72	39	1
1	79	1	3	92.643	75	2	51	23.8751	1	0	0	0	0	1	0	5.67	3.84	207	17	28	5.33	98	8.92	141	4.23	33.1	1
3	49	1	2	111.633	155	2	128	25.565	0	0	0	0	0	0	0	6.71	5.3	180	39	22	4.47	55	4.63	141.8	4.1	50.6	0
7	76	1	3	78.318	286	3	70	20.148	0	0	0	1	0	1	0	5.42	4.27	220	10	18	4.48	71	5.92	140.6	5	34.3	1
7	69	1	2	101.315	450	3	232	18.0535	1	0	0	0	0	1	0	8.89	4.37	304	9	14	4.06	52	4.56	142	4.24	33.6	0
4	41	1	2	82.988	94	3	43	22.5306	0	0	0	0	0	1	0	15.33	4.14	321	15	18	5.21	69	5.18	139	4.56	33.4	1
1	66	1	2	105.324	90	2	75	20.5693	0	0	0	0	0	0	0	5.82	4.11	123	22	21	5.15	109	11.35	143.7	3.91	36.6	0
3	72	1	2	119.306	127	2	70	19.433	0	0	0	0	0	1	0	5.86	3.91	127	33	34	4.47	35.5	8.5	140.4	4.35	35.5	1
1	56	0	2	92.651	49	2	25	19.5312	0	0	0	0	0	0	0	3.52	3.79	352	9	14	4.5	34	4.2	140.9	5.69	34.7	0
7	78	0	2	116.299	290	3	105	21.4844	1	0	0	0	0	0	0	5.24	3.65	132	22	25	9.17	72	5.3	137.6	4.32	39.8	0
3	65	1	2	99.984	223	2	189	20.5693	0	0	0	0	0	0	0	6.47	3.84	181	6	10	4.6	88	7.48	144	4.44	30.8	0
7	63	1	3	97.649	501	2	139	24.9787	0	0	0	0	0	1	0	9.77	5.02	140	39	29	5.79	100	7.61	132.2	4.29	37.7	1
1	52	0	3	108.308	105	3	85	25.1486	0	1	0	0	0	0	0	5.96	4.5	133	14	17	6.05	48	4.89	142.4	4.12	41.7	0
1	51	1	2	91.978	74	2	40	26.7229	0	0	0	0	0	0	1	4.42	4.97	196	10	12	5.8	60	6.43	140.4	4.23	38	0
7	66	1	2	101.646	258	3	110	22.4913	0	0	0	0	0	0	0	5.84	5.07	183	20	21	5.19	76	7.92	141	4.63	42.1	0
3	50	0	2	92.319	113	2	85	22.6409	0	0	0	0	0	0	0	3.23	4.44	171	11	18	4.95	49	5.64	140.1	4.52	40.4	0
1	55	0	2	107.642	100	3	37	22.5827	0	0	0	0	0	0	0	5.46	4	193	9	15	4.96	51	4.77	143.9	4.4	33.4	0
1	35	1	3	145.646	57	2	33	25.5354	1	0	0	0	0	1	0	7.76	5.6	163	20	19	5.5	97	5.45	140	3.92	43.5	1
3	45	0	3	92.312	135	3	99	19.5312	0	0	0	0	1	0	0	4.18	3.89	235	7	15	4.67	50	3.64	139.6	4.35	38.8	1
1	72	0	2	112.643	183	2	105	21.4286	0	0	0	0	0	0	0	14.69	3.76	168	24	29	5.12	71	5.47	144.7	3.74	38.5	0
1	62	1	2	112.645	96	2	61	26.2188	0	0	0	0	0	0	0	5.32	4.5	168	36	33	10.23	77	5.73	142	4.17	45.6	0
1	59	0	2	111.648	81	2	48	28.9811	1	1	1	0	0	0	0	10.25	4.44	264	33	19	6.61	49	6.01	143.1	3.89	40.5	0
6	52	1	2	116.315	212	3	200	27.9431	0	0	1	0	0	0	0	5.44	4.75	120	19	17	5.23	63	5.611	143.1	3.82	37.3	1
7	70	1	2	94.312	324	3	98	25	0	0	0	0	0	1	0	5.17	4.48	109	36	34	4.83	70	9.1	145.6	3.65	35.2	1
3	71	1	2	100.312	170	2	146	19.4674	0	0	0	0	0	1	0	3.28	4.09	176	11	20	5.18	56	5	142.8	3.88	34.1	0
1	66	1	2	107.643	96	2	38	28.699	1	0	0	0	0	1	0	6.32	4.58	180	21	22	5.04	61	8.28	140.4	3.5	36.7	0
3	72	0	3	102.983	247	2	186	24.8889	1	0	1	0	0	0	0	5.5	4.04	155	20	15	6.55	55	5.52	135.7	3.81	39.4	1
3	52	1	2	95.321	201	2	148	24.5675	0	0	0	0	0	0	0	5.36	5.09	170	30	25	5.45	56	5.55	142.2	3.95	42	0
1	24	1	2	95.987	66	3	49	17.531	0	0	0	0	0	0	0	6.64	5.13	266	8	13	4.24	63	4.28	139.7	4.05	41	0
3	62	1	3	119.975	134	2	80	23.768	1	0	0	0	0	1	0	8.69	4.19	112	29	29	4.97	73	4.76	142.4	3.84	34.9	1
1	81	1	3	110.975	80	2	66	20.7612	1	0	0	1	1	0	0	5.33	3.57	129	21	19	5.34	96	10.89	150.9	3.66	32.8	1
7	51	0	2	86.657	111	3	56	9.90703	0	0	0	0	0	0	0	4.59	4.51	210	7	17	5.12	51	6.89	141.6	3.92	38	0
1	54	1	2	105.309	130	3	103	26.1224	0	0	0	0	0	0	0	7.8	4.11	238	36	31	5.21	105	7.43	142.8	4.37	41.4	0
7	67	1	3	93.975	456	3	208	24.093	0	1	0	0	0	1	0	3.82	3.68	134	7	11	8.03	72	6.14	139.6	4.39	37.7	1
1	74	0	2	128.633	69	2	60	29.7521	0	1	0	0	0	0	0	5.81	5.07	264	18	17	5.8	42	8.75	141.2	4.14	37	0
3	26	1	2	96.986	105	2	87	18.9292	0	0	0	0	0	0	0	7.37	4.16	202	12	20	5	50	7	142.2	3.9	37.6	0
7	74	1	2	99.979	324	3	118	22.7583	0	0	0	0	0	0	0	5.17	4.72	173	23	22	5.11	63	3.49	142.1	3.61	39.2	1
2	60	1	2	113.312	298	2	210	20.7347	0	0	0	0	0	1	1	9.26	4.55	301	9	13	5.35	42	3.51	140.2	4.41	42	0
3	68	1	2	113.97	285	2	189	26.6436	1	0	0	0	0	1	0	5.34	4.7	123	29	23	7.71	88	6.5	140.4	4.01	44.1	0
1	62	0	3	70.986	195	2	140	22.4323	1	1	1	1	0	0	0	6.45	4.15	167	31	20	5.39	51	3.93	143.5	3.65	39.9	1
7	72	1	2	62.981	357	3	134	22.4913	0	0	0	0	0	0	0	8.83	3.81	367	10	13	5.01	98	3.98	138.6	3.72	32.1	0
6	28	1	2	86.985	108	2	55	27.7634	0	0	0	0	0	0	0	6.47	5.35	243	43	27	4.88	67	4.65	137.9	4.65	44.6	0
3	66	0	2	105.646	180	3	155	27.0552	0	0	0	0	0	0	0	6.16	4.7	232	12	15	5.3	39	4.75	140.7	4.1	35.4	0
3	59	1	2	87.313	190	2	160	20.6193	0	0	0	0	0	0	0	7.66	4.34	215	11	11	5.51	57	7.67	140.5	4.08	36.6	0
3	62	1	2	111.307	185	2	162	23.6614	1	0	0	0	0	0	0	8	3.32	471	18	15	5.17	82	7.51	141.7	3.77	33.2	0
7	76	1	2	94.316	267	3	75	21.3039	0	0	0	0	0	0	0	4.66	4.84	158	18	31	4.97	89	6.98	137.5	4.7	40.1	0
2	53	0	2	91.317	134	2	78	18.132	0	0	0	0	0	0	0	5.17	4.1	202	10	13	5.13	53	5.49	142.2	4.43	40.7	0
3	80	1	2	103.305	166	2	113	23.4375	0	0	0	0	0	0	0	6.01	4.71	248	50	47	5.23	79	8	137.7	4.39	39.4	0
7	77	1	3	105.975	310	2	92	24.7721	1	0	0	0	0	0	0	6.91	4.68	131	29	21	5.53	91	6.64	140.7	3.42	39.8	1
7	54	1	2	96.322	322	2	127	23.8754	0	0	0	0	0	1	0	4.08	4.88	168	16	17	5.99	71	7.04	143.1	4.03	37	1
3	69	1	2	134.31	233	2	150	26.4308	0	0	0	0	0	0	0	4.96	4.73	146	20	28	5.27	91	6.19	140.4	4.64	42.6	0
2	58	0	2	88.646	195	2	167	21.0828	0	0	0	0	0	0	0	3.65	3.68	167	10	18	4.93	58	5.63	142.2	3.77	39.2	0
5	85	1	3	110.97	150	2	96	24.6244	0	0	0	0	1	0	0	3.38	3.82	71	12	22	5	73	5.86	141.7	3.88	35.3	1
3	40	1	2	91.988	143	2	127	18.7109	0	0	0	0	0	0	0	4.08	3.9	260	24	23	5.68	54	6.4	139.1	4.85	42.6	0
3	76	1	3	70.309	170	2	111	20.1956	0	0	0	1	1	0	0	11.93	4.26	196	17	24	5	67	7.91	135	4.14	39.1	1
7	75	1	2	91.648	365	3	158	19.1358	0	0	0	0	0	0	0	5.17	3.97	150	8	18	5.66	82	5.67	140.3	4.4	42	1
3	49	0	2	93.649	157	2	113	23.0469	0	0	0	0	0	0	0	5.01	4.54	162	15	17	4.77	47	5.68	137.2	3.72	40.4	0
5	66	1	3	118.312	220	2	70	16.0156	1	0	1	0	1	0	0	5.11	4.61	210	13	19	4.65	50	6.01	139.1	4.51	40.4	1
6	53	0	2	108.323	51	3	22	22.3543	0	0	0	0	0	0	0	4.14	3.82	187	12	18	4.91	54	5.71	138.8	3.66	39.9	0
1	65	1	2	96.98	150	3	95	16.1247	0	0	0	0	0	1	0	2.44	3.41	180	14	25	5.29	60	6.99	131.2	3.96	38.1	0
3	65	1	3	101.319	133	2	109	23.5294	0	0	0	1	0	0	0	4.67	4.61	210	22	21	5.9	129	5.69	137.5	3.99	41.6	1
2	62	0	2	120.301	199	2	155	19.2277	1	0	0	0	0	0	0	5.67	4.44	104	13	16	5.28	75	4.34	142.9	3.91	37.3	0
7	72	1	3	101.633	510	3	162	17.9151	0	0	1	1	0	0	0	7.22	3.2	274	10	19	6.01	112	7.04	140.6	2.86	29.9	1
1	23	1	2	90.318	45	2	18	20.5151	0	0	0	0	0	0	0	13.01	5.56	176	14	13	7.05	29	5.43	136	5.1	47.6	0
1	69	0	2	106.972	128	2	115	21.875	0	0	0	0	0	0	0	5.53	4.49	210	16	20	5.81	58	4.71	140	4.18	40.6	0
3	47	0	2	93.642	400	2	104	28.6726	0	0	0	0	0	0	0	6.6	5.33	288	9	11	5	46	3.75	141.1	3.11	40	1
3	62	1	2	114.313	173	2	124	28.2828	0	0	0	0	0	0	0	4.63	4.28	169	16	16	5.27	91	4.67	144.6	3.54	40.1	0
3	47	1	3	101.982	190	2	105	24.9135	0	0	0	0	0	1	0	3.54	4.29	179	15	15	5.72	110	8.56	141.4	4.29	38.9	1
6	61	1	3	132.647	83	3	44	22.4813	1	0	0	0	0	0	0	5.21	4.88	179	16	18	5.15	63	6.76	142	4.75	35.6	0
0	25	1	2	83.98	65	1	0	20.9107	0	0	0	0	0	0	0	6.49	4.83	159	13	12	4.39	52	4.39	136.8	4.09	46	0
3	69	1	2	98.655	310	2	240	23.1084	0	0	0	0	0	0	0	7.04	4.45	251	33	25	5.18	66	4.84	140	4.33	34.9	0
3	29	0	2	81.318	117	3	99	30.0433	0	0	0	0	0	0	0	5.32	3.95	212	6	12	4.63	67	5.02	138	3.99	36.1	0
1	54	1	2	97.99	56	2	33	22.8571	1	0	0	0	0	0	0	8.52	5.04	298	13	13	5.78	148	7.25	140	3.97	36.9	0
7	51	1	2	119.646	345	3	79	29.3878	0	0	0	0	0	0	0	5.59	5.07	198	26	23	6.56	85	4.72	140.8	4.04	44.3	0
2	68	0	3	103.97	243	2	187	30.8329	0	0	0	1	0	0	0	6.73	4.4	254	28	19	5.78	44	4.92	141.9	4.13	39.9	1
3	64	1	3	118.314	170	1	103	20.7612	0	0	0	1	0	0	0	6.16	4.94	195	27	20	7.46	98	7.43	144.8	3.98	37.9	1
1	64	0	2	84.988	76	3	56	18.7328	0	0	0	0	0	0	0	5.37	3.67	167	18	18	5.13	43	6.89	142.6	3.95	36.7	0
7	65	1	2	113.635	311	2	92	22.6852	1	0	0	1	0	1	0	2.54	3.34	147	12	18	6.04	73	6.44	143.1	4.16	37.4	1
5	23	1	2	104.986	200	2	55	27.4691	0	0	0	0	0	0	0	6.73	4.85	242	11	16	5	100	4.54	141	4.14	45.6	0
1	36	1	2	120.318	168	2	148	27.3356	0	0	0	0	0	0	0	5.66	4.94	95	18	15	8.6	94	4.67	142.1	4.11	45.3	0
1	70	1	2	100.314	175	2	113	23.1247	0	0	0	0	0	0	0	5.31	4.54	277	13	21	4.96	137	6.44	142.3	5.23	39.8	0
7	68	1	2	94.314	429	3	130	21.4692	0	0	0	0	0	0	0	3.45	4.32	134	20	13	9.86	59	4.78	140.6	4.31	42.5	0
2	61	1	2	102.31	261	2	25	18.6851	0	0	0	0	0	0	0	5.28	3.23	441	32	16	5.71	57	5.47	141.5	4.27	34.8	0
1	67	1	2	97.98	86	2	73	20.352	0	0	0	0	0	0	0	6.21	3.37	182	29	28	5	81	8.7	139	4.07	34.9	0
2	54	0	2	91.988	107	2	68	22.0386	0	0	0	0	0	0	0	5.73	4.41	175	11	15	4.96	39	4.53	142	4.14	36.9	0
7	66	1	2	103.304	366	3	142	21.0938	0	0	0	0	0	0	0	6.29	4.58	141	11	20	4.94	78	6.21	142.1	4.45	38.3	1
1	29	1	2	69.654	60	3	28	21.4692	0	0	0	0	0	0	0	5.81	5.44	270	15	21	4.77	72	4.37	143	4.65	44.9	0
3	57	1	2	103.306	156	2	112	22.3081	1	0	0	0	0	0	0	6.17	4.93	179	28	17	6.21	65	6.48	142	3.79	37.9	0
1	65	1	2	109.31	107	3	57	30.1103	0	0	0	0	0	0	0	5.46	4.68	71	77	55	6.19	59	3.98	139.4	3.38	45.1	0
3	61	0	3	114.642	140	2	78	26.1593	1	0	0	1	0	0	0	3.81	3.98	212	21	22	4.44	56	6.38	139.5	3.71	11.9	0
3	57	1	2	72.984	247	3	197	24.2424	0	0	0	0	0	0	0	6.61	4.2	204	192	118	4.93	62	7.4	138.2	4.81	38.9	0
1	57	1	2	102.31	70	2	46	21.875	0	1	1	0	0	1	1	6.29	5.08	154	22	31	7.99	59	3.61	141.7	4.47	45.8	0
3	45	0	2	107.647	136	2	106	24.4352	0	0	0	0	0	0	0	5.36	4.31	267	35	25	6.28	48	5.22	137.6	3.92	46.1	0
7	56	1	2	114.641	341	3	116	25.7117	0	0	0	0	0	0	0	6.3	3.7	151	43	28	6.44	96	3.47	141.9	3.54	33.4	0
3	46	0	2	95.982	172	2	123	20.7031	0	0	0	0	0	0	0	5.72	4.13	223	15	15	4.93	35	3.02	141	3.57	40.6	0
1	45	1	2	146.315	65	3	35	29.7265	1	0	0	0	0	1	0	5.62	4.92	204	15	17	5.74	79	7.21	137.8	4.54	41	0
3	53	0	2	106.976	150	2	100	21.6713	0	0	0	0	0	0	0	3.62	4.55	191	37	28	5	42	5.99	140.7	3.88	46.6	0
3	59	0	2	129.654	134	2	94	25.8761	0	0	0	0	1	0	0	4.73	4.42	179	15	21	4.86	66	7.39	141.6	4.17	44.4	0
1	18	1	2	98.986	94	3	63	20.0617	0	0	0	0	0	0	0	9.26	4.79	154	29	21	4.28	68	5	140.9	4.14	46.5	0
3	52	0	2	87.982	142	2	95	24.7475	0	0	0	0	0	0	0	5.05	4.79	209	21	20	6.37	60	5.77	140.1	4	41.2	0
3	48	1	2	98.314	150	2	98	21.3578	0	0	0	0	0	0	0	3.46	3.99	217	10	25	5.48	60	4.69	144.6	4.35	36.6	0
7	55	1	2	95.646	369	3	127	20.6905	0	0	0	0	0	0	0	4.95	3.9	268	9	14	5.25	90	5.42	142.6	3.92	37.2	0
7	74	1	2	107.983	313	3	136	26.3465	0	0	0	0	0	0	0	5.8	4.4	215	11	16	6.61	53	4.36	140.9	4.05	35.7	1
7	69	1	2	91.975	475	3	206	24.8971	0	0	0	0	0	0	0	9.05	4.81	330	16	24	5.95	80	6.2	138.5	4.39	44.5	0
3	63	1	2	98.985	147	1	65	17.7154	0	0	0	0	0	0	0	4.53	4.15	154	12	21	5.87	61	7.8	140.5	4.87	42.4	0
3	49	0	2	109.652	90	1	40	19.0677	0	0	0	0	0	0	0	5.13	3.56	306	20	25	4.24	40	5.16	140.1	4.53	39.1	0
1	49	1	1	81.315	48	3	74	24.8016	0	0	0	0	0	0	0	12.68	5.53	173	18	14	4.44	69	6.77	142.2	3.98	44.5	0
5	55	1	3	109.316	163	2	120	25.4694	0	0	0	0	0	1	0	7.18	4.81	166	20	21	5.59	67	3.98	140.1	3.42	40.6	0
2	52	1	1	101.65	249	3	153	24.677	0	0	0	0	0	0	0	3.3	4.58	174	22	19	4.8	74	6.55	143.6	4.4	44.4	0
2	77	0	3	116.97	143	2	100	26.6667	1	0	0	0	0	0	0	6.64	5.07	311	27	24	5.48	49	4.63	143.8	4.01	44.3	0
7	68	1	2	96.975	311	3	136	20.7008	0	0	0	0	0	0	0	3.82	4.27	118	14	22	5	54	6.09	142	3.86	41.8	0
3	68	1	2	110.98	105	2	120	19.7055	0	0	0	0	0	0	0	2.63	4.23	67	28	30	4.5	77	4.62	145.7	4.09	34.6	0
3	41	0	2	91.651	125	2	129	21.9671	0	0	0	0	0	0	0	6.49	4.41	323	14	13	4.77	45	4.59	144.2	4.55	40.6	0
6	61	0	2	96.319	95	3	47	22.8928	0	0	0	0	0	0	0	2.97	3.99	76	20	24	4.71	47	5.94	144.2	3.75	42.8	0
7	75	0	2	136.304	368	3	187	26.6667	0	0	0	0	0	0	0	3.93	3.77	126	14	27	5.23	68	7.21	147.6	3.96	42	1
7	61	1	2	93.643	376	3	189	19.721	1	0	0	0	0	1	0	4.8	4.44	189	8	16	4.83	71	8.31	138.1	4.11	42.7	1
3	35	1	1	100.981	172	2	114	26.6299	0	0	0	0	0	0	0	6.92	5.73	176	23	23	4.96	82	4.51	139.7	4.29	46.7	0
7	65	1	3	75.986	225	3	113	19.4708	0	0	0	0	0	0	0	5.3	3.58	126	9	16	5.15	46	6.61	139.7	4.19	41.3	0
2	68	0	2	103.316	151	2	142	19.1953	0	0	0	0	0	0	0	4.52	3.93	242	9	18	5.2	57	6.66	142.9	4.19	40.7	0
7	70	0	2	105.31	162	3	153	23.3333	0	0	0	0	0	0	0	4.61	4.24	201	11	21	4.49	62	2.94	143.8	3.87	35.5	0
1	61	0	2	89.653	110	2	80	22.8625	0	0	0	0	0	0	0	4.84	4.01	278	20	19	4.79	50	4.36	141.5	3.91	37.2	0
7	69	1	3	128.974	273	3	123	20.9042	1	0	0	0	0	1	0	4.39	3.95	169	21	26	4.32	64	5.06	149.8	4.05	41.3	1
3	61	1	2	100.314	174	2	156	29.0318	0	0	0	0	0	0	0	5.2	5.19	164	15	17	5.02	52	4.91	142.7	3.76	40.6	0
3	66	1	2	88.318	140	2	164	24.4418	0	0	0	0	0	0	0	7.67	4.67	242	17	22	4.61	67	5.94	143	4.17	40.1	0
7	60	1	2	105.984	403	1	168	18.3655	0	0	0	0	0	0	0	10.28	4.09	322	11	12	4.81	74	8.22	140.7	4.08	35.1	0
7	65	1	2	86.656	203	3	178	18.3594	0	0	0	0	0	0	0	5.63	3.89	267	19	25	4.35	67	6.08	144.9	5.05	40.2	0
2	48	0	2	128.64	78	2	63	24.974	1	0	0	0	0	0	0	5	5.34	253	9	16	5.33	61	3.04	141.5	3.9	43.9	0
5	64	1	3	101.981	155	2	101	19.0311	0	0	0	0	1	0	0	4.4	4.28	152	13	20	4.75	82	6.79	142.5	4.32	39.4	0
7	66	1	2	108.314	270	3	77	22.7732	0	0	0	0	0	0	0	4.33	4.29	169	17	19	5.37	79	5.18	12	3.59	39.5	0
7	65	1	2	96.649	310	3	120	19.2653	0	0	0	0	0	0	0	5.51	4.35	197	9	15	4.73	77	6.73	140	4.4	36	0
7	64	0	2	109.98	440	3	135	29.5525	1	0	0	0	0	0	0	5.6	4.71	197	23	25	5.45	53	3.37	137.6	4.04	41.2	0
6	62	0	2	86.648	108	3	100	17.9688	0	0	0	0	0	0	0	5.51	2.62	247	9	20	5.21	53	3.79	141.6	4	34.7	0
7	73	1	2	87.98	477	3	204	26.079	0	0	0	0	0	1	0	5.53	4.48	201	18	25	5.31	68	6.44	146.5	3.93	42.2	1
6	31	0	2	94.988	88	3	87	22.2656	0	0	0	0	0	0	0	3.77	4.52	210	11	16	4.45	48	3.63	143.6	4.16	47.5	0
6	55	1	2	122.637	105	3	89	27.7177	0	0	0	0	0	0	0	7.73	4.83	155	25	23	5.7	111	7.75	143.1	4.06	45.5	0
1	67	0	2	116.978	50	3	38	21.3333	0	0	0	0	0	0	0	10.41	4.57	276	17	24	5.06	55	5.4	145.1	3.96	37	0
3	64	1	2	98.648	122	2	103	22.231	0	0	0	0	0	0	0	6.05	4.31	218	25	22	5.2	55	5.97	144.1	4.26	45.4	0
3	66	1	2	105.646	256	2	227	27.268	1	1	0	0	0	0	0	6.31	4.29	207	13	13	5.19	67	5.69	140.1	3.9	39.8	0
3	70	0	2	115.64	126	2	84	24.7737	1	0	0	0	0	0	0	8.33	4.6	240	32	35	5.78	68	5.5	144.7	4.17	43.9	0
7	69	1	2	108.313	206	3	145	23.3067	0	0	0	0	0	0	0	5.92	4.53	214	13	23	4.85	71	8.63	141.6	4.15	42.8	0
5	63	1	3	97.974	220	2	133	22.5981	0	0	0	0	1	1	0	4.89	4.15	187	83	64	5.08	75	8.43	144.3	4.3	39	1
4	55	1	2	63.316	147	2	97	18.3391	0	0	0	0	0	0	0	8.25	4.57	211	22	23	6.27	44	3.82	138.4	3.59	35.4	0
6	70	1	2	111.974	163	2	147	23.5078	1	0	0	0	0	0	0	7.01	4.64	136	26	20	5.72	60	6.35	142	3.76	40	0
3	71	1	2	115.633	286	3	260	26.9896	1	0	0	0	0	0	0	7.06	4.84	263	14	16	6.63	82	5.99	144.1	4.35	43	0
1	65	1	2	113.649	97	2	38	21.7993	0	0	0	0	0	0	0	9.44	4.38	283	19	19	5.26	110	5.43	138.4	4.3	36.3	0
3	55	0	2	107.969	155	2	100	20.0288	0	0	0	0	0	0	0	4.16	3.85	149	12	22	5.1	50	5.06	141.8	3.82	32.2	0
7	70	1	2	87.317	193	3	159	20.7612	0	0	0	0	0	0	0	5.62	4.61	118	20	21	6.04	73	7.03	146.4	3.75	37.7	0
6	48	1	2	98.321	79	1	38	24.2424	1	0	0	0	0	0	0	5.77	5.28	224	21	21	4.87	75	6.6	141.4	4.41	47.2	0
7	47	1	2	104.977	496	3	142	21.7993	0	0	0	0	0	1	0	4.09	4.35	126	28	21	4.57	75	4.55	142.9	3.63	40.4	1
3	67	1	2	106.649	209	2	161	19.0451	0	0	0	0	0	0	0	10.62	4.04	261	26	23	4.84	89	5.22	142.1	5.09	39.8	0
1	58	1	2	110.315	85	2	35	25.7819	0	0	0	0	0	0	0	4.41	5.44	144	17	16	5.64	68	6.86	141.2	4	44.6	0
3	62	0	2	101.973	183	2	129	22.5161	0	0	0	0	0	0	0	7	4.21	293	8	14	4.66	77	7.27	144.7	3.55	38.7	0
0	22	0	2	68.984	52	4	0	16.3593	0	0	0	0	0	0	0	6.94	4.34	220	9	14	4.15	51	4.26	140.9	4.21	42	0
3	49	1	2	80.651	102	2	95	20.9343	0	0	0	0	0	0	0	5.2	4.91	217	13	18	5.28	82	7.56	146.1	3.61	42	0
2	65	0	2	117.978	201	2	144	25.0967	1	0	0	0	0	0	0	5.73	4.84	317	28	31	7.97	46	4.33	141.3	4.06	38.5	0
0	20	0	1	71.651	65	1	0	15.6225	0	0	0	0	0	0	0	6.89	4.62	230	7	15	5.38	53	3.75	142.7	3.79	48.6	0
6	38	1	2	102.985	74	1	0	23.3067	0	0	0	0	0	0	0	4.57	5.49	165	13	17	4.46	73	8.22	143.7	4.08	47	0
3	76	0	2	104.305	146	3	134	28.7201	1	0	0	0	0	0	0	7.45	4.07	392	11	13	5.14	102	4.76	143.8	3.69	38.1	0
7	68	1	2	117.308	230	3	177	19.9481	0	0	0	0	0	0	0	6.11	4.35	402	25	24	5.73	87	7.04	148.2	3.38	42.5	0
3	66	1	2	112.642	120	2	60	21.6713	0	0	0	0	0	0	0	9.8	4.85	98	20	26	5.06	76	5.8	139.7	3.7	34.7	0
7	68	0	2	126.98	198	2	160	30.0801	0	0	0	0	0	0	0	7.4	4.38	343	28	22	5.7	40	3.94	143.6	3.98	41	1
3	31	0	2	71.319	138	2	146	25.9766	0	0	0	0	0	0	0	5.8	4.85	325	12	7	4.93	49	5.2	142.6	4.32	35.6	0
0	22	1	1	98.649	38	1	0	22.6508	0	0	0	0	0	0	0	7.49	5.61	210	17	16	4.93	71	5.211	142	4.17	46.9	0
2	75	1	2	97.637	193	2	132	20.1951	1	0	1	0	0	1	0	6.63	4.18	193	26	24	4.86	99	5.27	141.9	3.84	37.2	0
3	80	1	2	102.973	200	2	160	26.2188	0	0	0	0	0	0	0	6.5	4.35	163	16	21	5.28	90	7.98	143.5	4.45	41.1	0
6	52	0	2	116.314	50	3	62	16.1616	0	0	0	0	0	0	0	6.01	4.24	194	11	22	4.79	44	5.26	142.7	3.83	46.2	0
7	72	1	2	119.308	256	3	126	21.551	1	0	0	0	0	1	0	4.76	4.03	236	14	18	6.55	120	7.51	145.5	4.04	40.8	1
3	64	1	2	135.306	136	2	72	14.3673	1	0	0	0	0	1	0	2.46	3.34	213	10	18	4.71	105	7.78	140.8	4.08	35.2	0
6	53	0	2	95.982	62	3	50	23.5304	0	0	0	0	0	0	0	6.57	5.25	180	9	16	5.15	55	5.12	142.4	4.21	44.1	0
3	61	1	3	86.323	144	2	64	26.1752	1	1	0	0	0	1	0	6.63	4.43	100	14	1	13.23	66	6.44	139.5	3.83	38.1	1
3	64	0	2	77.98	78	3	68	24.1965	1	0	1	0	0	0	0	5.6	4.35	224	11	17	4.77	83	7	134.8	3.66	41.7	0
3	71	1	2	111.982	150	2	79	25.4325	1	0	0	0	0	0	0	7.08	5.06	164	12	16	5.47	71	4.47	143	3.6	39.2	0
2	15	1	1	103.316	70	3	41	17.704	0	0	0	0	0	0	0	4.9	4.54	160	10	22	4.43	82	4.79	137.7	4.06	44.2	0
3	68	0	2	102.31	145	2	90	22.3133	1	0	1	0	0	0	0	4.14	4.087	159	10	17	5.06	51	6.31	144.6	3.47	37.6	0
5	21	1	2	93.314	97	3	62	15.2778	0	0	0	0	0	0	0	5.97	5.65	189	11	18	4.64	92	3.31	141.7	4	45.3	0
7	57	1	2	108.313	285	3	100	23.2434	0	0	0	0	0	1	0	23.83	5.14	150	69	44	5	101	9.21	145.2	4.14	34.3	1
2	75	1	3	92.313	237	2	182	19.5312	1	0	0	1	0	1	0	6.68	4.21	250	17	23	5.03	59	5.33	140.1	4.2	37	1
3	47	1	2	112.311	178	2	119	23.5294	0	0	0	0	0	1	0	6.23	5.05	219	28	22	4.34	64	3.01	142.8	4.41	38.3	1
3	68	0	2	108.642	143	2	140	26.4024	0	0	0	0	0	0	0	4.42	3.71	159	22	25	5.31	55	7.71	143.4	3.68	39.6	0
3	72	0	2	102.632	110	2	57	21.6413	0	0	0	0	0	0	0	6.38	4.41	162	33	28	5.52	41	6.23	143.5	3.33	42.7	0
3	63	0	2	109.298	125	2	72	24.2188	1	0	1	0	0	0	0	4.12	3.88	188	8	17	4.93	69	8.57	141	3.34	38.5	0
7	82	1	3	128.967	503	3	141	22.8374	0	0	0	1	0	1	0	7.55	4.01	116	9	16	4.99	107	9.9	141.2	4.35	40.8	1
3	62	1	3	119.306	417	2	287	19.1467	0	1	0	0	1	1	0	6.73	5.04	98	24	26	6.09	108	5.46	146.4	4.22	40.2	1
3	75	0	2	98.976	217	2	168	17.0656	0	0	0	0	0	0	0	7.06	4.75	378	12	14	4.99	65	4.54	143.3	3.94	36	1
3	67	1	2	95.98	187	3	115	22.9854	0	0	0	0	0	0	0	6.91	3.52	282	11	15	5.27	69	2.49	142.9	4.22	33.2	0
7	71	0	2	111.637	344	3	178	24.1415	0	0	0	0	0	0	0	5.91	4.61	230	12	21	5.08	56	5.13	142.8	3.66	43.3	1
7	73	1	3	104.641	555	3	189	20.202	1	0	0	0	0	1	0	4.5	3.92	100	23	27	4.9	90	4.64	143.2	4.64	40.4	1
3	66	1	3	129.637	154	2	98	25.0995	0	0	0	1	0	0	0	7.77	4.87	217	16	17	5.38	76	7.37	142.2	4.01	38.1	1
3	63	1	2	107.646	230	2	187	19.0311	0	0	0	1	0	0	0	4.73	3.8	157	24	23	4.53	63	5.64	141.6	4.01	32.6	0
2	66	1	2	100.985	214	2	162	22.5306	0	0	0	0	0	0	0	4.18	4.93	123	15	19	4.89	76	6.18	147.4	3.71	37.1	1
1	19	1	2	98.314	66	2	26	16.1728	0	0	0	0	0	0	0	6.67	5.45	210	11	14	4.41	70	5.42	141.4	4.03	45.3	0
7	74	1	2	88.644	362	3	144	20.202	0	0	0	0	0	0	0	6.44	4.18	216	27	35	4.67	58	5.05	141.5	4.32	36.3	0
3	47	1	2	110.644	105	3	89	24.6755	0	0	0	0	0	0	0	11.39	4.95	485	19	15	5.82	71	5.7	140.1	4.42	43.3	0
7	61	1	1	83.32	300	3	100	26.2976	0	0	0	0	0	0	0	5.35	4.83	158	21	20	5.71	83	5.5	144.8	3.7	40.6	1
6	54	1	2	102.979	270	2	212	22.5981	0	0	0	0	0	0	0	5.38	4.37	205	24	22	5.12	66	7.57	142.6	4.02	41.2	0
3	47	0	2	89.645	86	2	100	22.1003	0	0	0	0	0	0	0	4.7	4.77	174	13	18	5.36	48	5.07	143.1	4.14	42.2	0
7	68	1	2	106.978	175	3	140	22.8374	1	0	0	0	0	0	0	4.74	4.46	192	12	20	5.18	63	4.71	139.6	4.2	40.1	0
3	57	0	2	108.315	110	2	90	21.4844	0	0	0	0	0	0	0	4.47	4.15	220	18	22	5.63	45	5.07	141.6	4.1	41.9	1
6	49	1	1	115.985	93	3	92	24.3824	0	0	0	0	0	0	0	6.92	4.71	148	22	25	5.87	66	4.82	141	4.12	39.8	0
7	72	1	3	110.306	360	3	190	21.3039	0	0	0	1	0	0	0	6.29	4.06	210	10	16	5.53	97	6.87	142.2	4.28	37.6	1
5	16	1	2	99.978	130	2	22	16.0494	0	0	0	0	0	0	0	4.17	5.05	212	9	17	5.93	51	4.51	142.5	4.23	48.8	0
6	47	1	2	108.982	75	3	38	22.8374	0	0	0	0	0	0	0	6.71	4.53	177	12	14	5	79	6.51	140	3.8	40.4	0
1	75	1	3	113.641	165	2	160	18.2531	0	0	0	1	1	1	0	7.69	4.75	155	19	28	4.46	70	6.62	141.8	4.46	40.4	1
3	57	1	2	104.649	68	2	39	18.0785	0	0	0	0	0	0	0	3.82	4.33	69	31	36	5.29	56	6.05	142.7	3.84	34.6	0
3	53	0	2	113.971	110	2	58	23.1111	1	0	0	0	0	0	0	4.69	4.11	171	22	25	5.23	63	5.92	145.9	3.32	39.6	0
8	52	0	2	119.971	147	2	92	28.3039	0	0	0	0	0	0	0	3.87	3.91	143	60	45	4.99	56	6.41	138.4	3.94	39.1	0
7	70	1	2	95.644	380	3	130	22.8374	0	0	0	0	0	0	0	5.45	4.66	170	14	21	4.53	85	6.4	139.7	3.92	43.2	1
7	53	1	2	112.643	174	3	131	20.0184	0	0	0	0	0	0	0	6.24	4.02	181	20	18	5.52	58	3.03	142.5	4.22	38.9	0
8	65	1	3	84.322	189	3	105	16.6531	0	0	0	0	1	0	0	5.48	4.03	326	15	17	4.22	69	5.64	137.4	4.49	38.8	1
2	61	0	2	100.311	378	2	303	18.8271	0	0	0	0	0	1	0	4.99	4.31	116	11	20	5.19	64	5.15	140.4	4.78	42.1	1
7	66	1	2	64.325	195	3	128	20.0773	0	0	0	0	0	0	0	5.83	4.95	213	11	16	4.35	56	6.34	142.7	4.6	39.9	0
1	67	1	3	121.641	90	2	72	24.5675	0	0	0	0	0	1	0	8.86	4.55	232	14	17	6.23	80	7.15	139.4	4.07	41.5	0
3	56	1	1	111.645	170	2	126	20.5693	0	0	0	0	0	0	0	4.95	4.71	156	30	24	4.64	85	4.84	141.1	4.31	40	0
7	72	1	2	106.317	283	3	224	17.2879	0	0	0	0	0	1	0	5.61	4.48	144	10	20	5.32	67	6.21	139.7	3.56	39.8	1
3	54	0	2	105.636	160	3	125	25.3906	0	0	0	0	0	1	0	6.57	4.51	195	25	22	4.92	61	7.15	138	4.08	39.5	1
7	61	1	3	111.645	297	3	82	27.0416	0	0	0	1	0	1	0	5.29	4.98	234	17	15	5.23	89	5.6	141.8	4.03	42.7	1
7	49	0	2	116.32	355	3	157	25.1532	0	0	0	0	0	0	0	7.8	5.08	310	24	25	4.7	46	4.5	142	4.46	47.3	0
3	33	0	1	92.651	226	3	131	17.6254	0	0	0	0	0	0	0	5.98	4.07	312	11	18	5.1	51	4.55	141.5	3.89	41.2	0
3	69	1	3	109.98	209	2	145	21.875	0	0	0	0	0	1	1	2	3.51	215	6	15	4.89	69	11.05	142.9	4.01	33.7	1
3	56	1	2	133.971	53	2	53	17.1875	0	0	0	0	0	0	0	4.33	4.54	205	15	19	5.15	61	10.2	140.2	4.07	40.7	0
1	34	1	2	88.983	49	2	45	20.9107	0	0	0	0	0	0	0	4.99	5.22	210	7	16	4.71	75	4.99	141.9	4.14	42.4	0
7	56	0	2	101.649	265	3	62	16.4644	0	0	0	0	0	0	0	5.59	4.11	175	7	16	5.1	50	5.15	141.8	3.99	38.4	1
7	72	1	3	137.971	450	3	122	18.6851	1	0	0	0	0	0	0	5.46	3.7	219	10	21	4.86	78	5.36	141.1	4.28	41	0
3	58	0	2	95.977	122	2	107	21.9076	0	0	0	0	0	0	0	6.58	4.32	237	10	16	5.22	59	5.53	140.9	4.37	37.8	0
3	47	0	2	95.98	90	2	68	23.8087	0	0	0	0	0	0	0	5.61	4.07	180	11	16	4.34	48	3.81	139.5	3.62	34	0
8	50	0	2	100.317	252	3	114	26.0262	0	0	0	0	0	1	0	5.07	3.94	309	15	19	5.32	37	4.15	141.4	3.71	38.7	0
7	68	0	3	107.315	420	3	165	20.7157	0	0	0	0	0	0	0	14.4	3.47	233	9	18	4.75	88	4.84	139	3.53	32.2	0
3	53	0	2	129.309	80	2	46	22.8928	0	0	0	0	0	0	0	7.81	4.4	257	10	16	5.07	54	4.33	143.9	4.19	38.9	0
5	15	1	1	114.982	135	3	56	17.531	0	0	0	0	0	0	0	4.38	5.15	253	13	17	4.79	59	4.06	144.4	4.34	47.9	0
7	62	1	2	117.646	305	3	90	20.1771	1	0	0	0	0	0	0	5.45	4.54	103	22	31	5.24	47	4.05	143.3	3.75	35.5	0
3	55	0	2	115.979	105	1	73	18.1787	1	0	0	0	0	1	0	4.8	4.22	200	5	19	5.02	51	4.93	145.6	4.15	41.3	0
3	64	0	3	84.646	152	2	105	25.6369	1	0	1	0	0	1	0	8.94	5.02	220	24	20	5.27	96	8.42	143.8	4.05	42.6	1
3	70	0	2	88.319	94	2	106	25.5296	0	0	0	0	0	0	0	5.6	4.69	182	19	23	5.97	46	8.44	142.4	4.29	37.8	0
3	60	1	2	98.641	263	2	65	20.202	0	1	0	0	0	1	0	7.25	4.56	219	15	15	11.64	58	4.62	141.8	4.34	37.7	1
3	58	0	2	85.976	60	3	32	21.3039	0	0	0	0	0	0	0	5.89	3.83	163	8	17	5.24	61	5.59	144.4	3.71	42.7	0
4	61	1	2	77.318	116	2	51	23.084	0	0	0	0	0	0	0	4.29	3.6	148	12	17	5.04	66	4.74	143.1	5.09	35.5	0
6	75	0	2	140.969	90	3	64	19.6752	1	0	0	0	0	0	0	5.67	3.61	360	8	19	5.08	88	8.73	142.1	4.27	41.3	0
2	33	1	2	94.992	394	2	304	28.2828	0	0	0	0	0	0	0	5.9	5	254	43	24	5.35	68	5.51	144.1	4.31	40.8	1
3	62	1	2	110.642	228	2	201	23.0518	0	0	0	0	0	0	0	6.35	3.72	214	38	20	4.13	50	5.5	142.7	3.9	35.6	0
3	66	0	2	83.976	216	3	187	12.8156	0	0	0	0	0	0	0	5.49	3.8	350	10	27	4.62	42	4.89	139	3.99	32.1	0
7	40	1	2	93.655	348	3	195	27.0416	0	0	0	0	0	0	0	6.47	5.39	230	21	19	5.6	62	4.7	142.1	4.21	47.8	1
3	56	1	2	100.309	258	2	140	24.539	0	0	0	0	0	0	0	9.62	3.88	237	24	28	5.41	50	5.26	138.1	3.83	31.8	0
0	18	1	1	95.981	61	1	0	16.7219	0	0	0	0	0	0	0	5.81	4.87	130	16	24	4.78	80	5.1	143.1	4.29	50.5	0
3	46	0	2	107.968	160	3	157	21.875	1	1	0	0	0	0	0	8.33	3.92	170	7	12	6.82	57	5.54	137	3.94	36.2	0
3	29	1	1	111.316	70	2	20	27.7703	0	0	0	0	0	0	0	7.94	5	311	36	22	5.31	61	5.19	139.5	4.14	40.9	0
2	57	1	2	85.319	158	2	150	21.5139	0	0	0	0	0	0	0	5.7	4.98	198	18	19	5.65	66	8.23	138.4	4.43	40.5	0
7	69	1	2	129.639	288	3	79	23.4375	1	0	0	0	0	1	0	7.44	4.86	310	23	23	6.61	67	3.87	143.2	3.69	40.8	1
3	48	1	3	104.651	78	2	53	20.7612	0	0	0	0	0	0	0	4.63	4.9	164	44	25	4.97	65	6.29	143.3	3.97	39.9	0
7	63	1	2	121.645	350	3	188	21.0077	0	0	0	0	0	0	0	4.47	4.02	93	109	76	5.74	67	6.21	143.3	3.75	45.6	0
7	77	1	3	106.963	538	3	115	22.231	1	0	0	0	0	0	0	2.6	1.95	109	12	23	5.31	72	2.99	145.3	3.91	37.6	1
6	70	1	2	107.646	128	2	69	26.7698	1	0	0	1	0	1	0	5.3	4.14	190	37	28	5.01	95	5.3	145.7	4.39	39.8	0
2	50	1	2	98.31	120	3	95	21.4619	0	0	0	0	0	0	0	5.16	3.55	238	7	21	4.97	60	4.94	142.9	4.03	40.6	0
3	53	0	2	101.303	140	3	88	20.5688	1	0	0	0	0	0	0	3.53	4.44	167	15	23	5.22	69	5.09	139	3.45	40.9	0
3	70	1	3	107.974	204	3	182	23.1415	0	1	1	0	0	0	0	5.95	4.74	256	13	16	12.89	70	8.91	139	4.43	45	1
2	33	1	2	94.32	60	3	49	20.7157	0	0	0	0	0	0	0	14.28	4.83	222	8	15	7.3	63	3.98	138.1	3.71	43.8	0
3	56	0	3	92.989	253	2	137	22.6562	1	1	1	1	0	0	0	4.15	4.37	224	11	15	5.11	50	5.8	140.1	3.84	41.5	0
2	69	1	2	101.97	79	2	68	27.2173	1	0	0	0	0	0	0	5.72	5.11	60	15	16	5.61	88	5.98	143.8	3.64	39.1	0
7	52	0	2	90.649	375	3	290	33.7149	0	0	0	0	0	0	0	7.24	3.83	160	17	14	4.76	43	7.22	142.2	3.9	31.8	1
3	64	1	2	88.649	169	2	144	22.3673	0	0	0	0	0	0	0	9.12	4.21	137	13	21	5.4	44	4.81	138.6	3.49	34.4	0
7	53	1	2	103.643	341	3	112	20.7612	0	0	0	0	0	1	0	9.3	3.92	209	20	25	5.83	52	5.82	142.3	3.69	40.7	1
3	55	1	2	88.651	201	2	147	27.5482	0	0	0	0	0	0	0	4.54	4.45	217	14	17	5.37	92	5.83	142.1	4.36	34.3	0
7	78	1	2	114.983	493	3	108	22.5896	0	0	0	0	0	0	0	3.64	3.82	108	11	19	4.69	73	4.17	142.3	3.92	37.3	1
3	71	1	2	124.97	55	2	40	20.7612	1	0	1	0	0	0	0	4.93	3.61	99	26	30	4.34	87	5.35	144.9	4.07	37.1	0
7	75	0	3	110.637	165	3	129	16.2331	0	0	0	0	0	0	0	3.94	3.72	246	13	24	5	48	6.19	145.8	4.65	37.6	0
3	73	1	2	85.983	285	2	232	18.1252	0	0	0	0	0	0	0	3.37	4.43	152	16	20	5.73	67	6.74	144	4.2	36	0
1	22	1	2	84.318	78	3	64	15.0948	0	0	0	0	0	0	0	9.46	5.21	182	4	15	4.01	70	2.03	143	3.47	48.8	1
2	39	0	2	78.318	53	2	30	20.202	0	0	0	0	0	0	0	4.69	4.03	265	11	17	5.24	61	4.98	143.3	4.35	42.8	0
2	51	0	2	81.319	105	2	55	19.313	0	0	0	0	0	0	0	4.51	4.42	193	14	26	4.77	41	4.37	140.5	4.42	38.9	0
2	44	0	2	109.646	85	3	58	18.75	0	0	0	0	0	0	0	5.42	4.23	230	11	17	4.7	45	3.65	139.5	4.9	39.1	0
7	74	1	2	136.635	335	3	99	24.2215	1	0	0	0	0	0	0	7.38	4.74	192	22	29	5	81	2.49	143.5	3.93	42.3	1
2	76	1	3	106.973	165	2	130	17.301	1	0	0	0	0	0	0	7.84	3.69	304	12	13	4.81	55	5.43	138.6	3.59	35.9	0
8	34	1	2	108.649	220	3	194	33.5938	0	0	0	0	0	0	0	6.86	5.62	260	17	15	5.68	56	7.87	145.2	3.9	43.5	0
7	55	1	2	81.646	315	3	135	19.0311	0	0	0	0	0	1	0	4.47	4.64	140	16	21	4.42	54	6.58	137.4	4.19	42.9	0
7	55	1	2	101.323	237	3	208	16.955	0	0	0	0	0	0	0	15.87	4.98	372	7	12	4.01	58	3.68	135.9	4.88	30.8	1
6	63	0	2	85.655	66	2	57	24.977	1	0	0	0	0	0	0	3.44	4.15	188	19	19	4.98	59	6.49	144.2	4.3	38.2	0
2	70	1	2	85.304	105	2	45	23.8754	0	0	0	0	0	0	0	4.78	3.91	76	28	26	4.79	94	6.39	142.5	4.45	38.3	0
3	68	0	2	84.651	180	2	124	29.1363	0	1	0	0	0	0	0	6.74	4.22	168	19	22	7.63	44	4.25	142.4	4.25	38.8	0
7	61	1	2	87.646	396	2	159	22.2222	0	0	0	0	0	0	0	4.07	4.08	161	10	18	5.48	75	6.18	140.2	4.16	40.4	0
6	54	0	2	101.971	85	3	60	19.5312	0	0	0	0	1	0	0	3.75	4.02	243	26	25	5.4	55	3.91	141.6	3.93	38	0
3	63	1	3	95.311	259	2	216	18.3655	0	0	0	0	1	0	0	6	4.14	172	16	23	4.99	52	5.01	139.7	3.71	34.4	1
7	73	1	3	94.641	250	3	191	25.4581	0	1	0	0	1	1	0	4.06	4.16	141	22	26	5.01	83	3.55	142	4.79	43.6	1
3	73	1	2	107.318	190	2	158	25	0	0	0	1	0	1	0	5.16	5	166	30	26	5.21	65	4.45	150.9	3.24	42.8	0
5	22	1	2	85.643	150	2	49	19.9184	0	0	0	0	0	0	0	7.07	5.02	148	16	18	3.72	83	6.91	142.7	3.81	44	0
2	75	1	3	84.972	72	3	54	17.5781	0	0	0	0	0	0	0	6.7	3.75	349	15	21	5.31	82	3.1	139.9	4.23	38.1	0
2	46	0	1	108.983	73	2	54	22.2656	0	0	0	0	0	0	0	6.15	4.67	182	47	34	4.27	61	4.82	139.5	4.1	46.2	0
3	66	1	2	80.976	260	2	223	20.6174	0	0	0	0	0	0	0	5.55	3.68	115	42	43	4.73	82	5.69	140.3	3.91	37.3	0
2	75	0	2	114.304	146	2	128	24.1415	1	0	0	0	0	0	0	5.37	3.76	304	25	29	4.9	59	4.01	144.1	4.74	35.3	0
8	44	0	2	110.315	75	3	72	22.4323	0	0	0	0	0	0	0	6	3.76	178	16	22	4.67	47	4.85	140.1	3.48	39.2	0
1	52	1	2	84.316	56	3	42	17.5056	0	0	0	0	0	0	0	3.44	4.54	166	15	20	4.67	77	9.18	142.3	3.95	37.5	0
3	37	1	2	109.307	88	2	44	20.3704	0	0	0	0	0	0	0	7.47	5.21	264	10	15	4.08	72	5.33	141.5	4.08	41.4	0
6	31	0	2	102.653	118	3	64	19.6283	0	0	0	0	0	0	0	10.3	4.04	274	9	16	4.85	52	5.07	139.5	4.8	44.8	0
3	54	1	2	101.651	160	2	128	18.3594	1	0	0	0	0	0	0	5.26	4.48	221	20	16	4.85	43	4.96	142.5	3.96	36.5	0
3	70	0	2	117.648	170	2	137	19.4363	0	0	0	0	0	0	0	9.16	4.95	282	43	46	5.01	68	5.31	142.6	4.68	40.3	0
3	20	0	2	86.313	148	3	127	16.7969	0	0	0	0	0	0	0	5.98	4.46	208	9	20	3.94	58	4.17	140.4	4.41	43.1	0
3	69	0	2	104.647	187	2	139	22.0386	0	0	0	0	0	0	0	6.26	4.21	190	14	17	4.21	53	6.69	145.7	4.08	38.3	0
8	53	0	2	116.646	96	1	46	20.8117	0	0	0	0	0	0	0	2.5	3.5	89	12	19	4.25	59	4.44	144.3	3.55	42.3	0
7	66	1	2	98.304	90	1	35	26.1224	1	0	0	1	0	1	0	3.37	4.42	121	15	21	6.8	63	3.15	139.9	3.71	36.7	0
3	50	1	2	125.643	115	2	65	24.2215	1	0	0	0	0	1	0	4.18	4.42	210	18	16	12.62	107	4.66	143.1	3.42	42	0
3	54	1	3	102.646	130	2	76	19.2336	0	0	0	0	1	0	0	6.12	3.61	159	11	19	4.96	209	11.49	143.9	3.97	39.5	1
3	38	1	2	99.644	80	2	35	17.0993	0	0	0	0	0	1	0	4.74	4.56	264	11	22	4.43	64	3.59	141.9	4.09	43.3	0
1	34	1	2	101.323	52	3	28	17.7557	0	0	0	0	0	1	0	8.8	4.96	267	10	15	4.55	71	5.5	140.2	4.71	44.5	0
6	70	1	1	124.638	126	3	87	18.5901	0	0	0	0	0	0	0	5.62	5.61	173	19	26	4.67	89	8.4	139.5	4.26	40.3	0
3	31	1	2	93.655	155	3	125	19.6927	0	0	0	0	0	0	0	11.06	4.95	268	17	20	5.16	75	5.43	139.6	4.98	42.1	0
6	69	1	2	99.978	277	3	134	22.2041	0	0	0	0	0	1	1	6.27	3.15	239	9	15	5.97	115	7.14	140.2	3.96	30.5	0
2	63	0	2	103.649	318	2	235	16.4062	0	0	0	0	0	0	0	2.66	4.19	149	10	20	4.19	44	2.94	144.9	4.12	43	0
3	53	1	2	99.643	107	2	59	24.0055	1	0	0	0	0	1	0	10.85	4.66	176	32	24	5.7	102	4.99	143.4	3.63	37.3	0
3	65	0	2	96.32	163	2	114	24.3418	0	0	0	0	0	0	0	7.09	4.29	161	23	26	4.22	64	5.31	140.6	3.88	39.3	0
7	82	1	3	88.649	182	3	123	21.8724	0	0	1	0	1	1	0	5.71	3.43	226	12	16	5	71	4.05	141.4	4.19	31.8	1
1	67	1	2	101.979	140	2	89	19.1571	0	0	0	0	1	0	0	4.66	4.09	97	16	20	5.04	74	4.45	144	3.68	36.6	0
1	21	1	2	91.649	46	2	15	15.5368	0	0	0	1	0	0	0	12.49	5.34	359	12	15	5.23	77	4.23	140.7	4.45	49.5	0
6	41	1	1	91.311	144	3	88	24.3375	0	0	0	0	0	0	0	6.81	4.73	199	17	17	4.6	74	5.02	138.8	4.05	36.9	0
3	64	1	2	115.978	149	2	105	19.3698	0	0	0	0	0	0	0	5.08	4.58	206	37	31	5.65	70	7.12	137.5	4.75	37	0
2	70	1	2	130.636	165	2	137	30.478	1	0	0	0	0	1	1	9.77	4.75	130	17	17	5.76	109	7.78	141.8	3.73	37.2	0
7	69	1	2	96.65	190	3	146	18.75	0	0	0	0	0	1	1	6.22	4.24	270	8	19	4.79	82	5.96	141	4.33	40.2	1
8	73	1	2	99.314	220	2	159	23.3844	0	0	0	0	0	1	1	14.4	3.92	242	57	46	5	54	5.66	136.4	3.54	30.7	0
2	61	0	3	102.295	164	2	128	24.1217	1	1	0	1	0	0	0	6.07	3.29	196	13	17	5.16	88	8.5	143.3	4.29	36.3	0
3	63	0	3	107.98	308	1	235	32.4219	0	1	0	1	0	0	0	4.12	4.01	171	80	50	13.93	46	2.59	144.4	2.8	32.7	1
7	66	1	2	101.304	273	3	98	24.6097	0	0	0	0	0	1	0	4.35	4.12	88	16	20	4.9	88	9.92	140.8	4.08	41.6	1
3	65	0	2	90.974	220	2	156	27.0552	1	0	0	0	0	0	0	5.61	4.57	208	16	21	6.56	38	5.28	139.1	2.82	41.9	0
3	61	1	2	103.313	188	2	175	23.4375	0	0	0	0	0	0	0	7.42	5.01	210	9	11	4.67	60	6.88	147.8	4.15	41.4	0
2	54	0	2	95.643	149	2	8	20.8209	0	0	0	0	0	0	0	4.95	4.41	118	20	24	4.86	69	3.56	143.2	4.05	43.2	0
8	77	1	2	110.311	75	3	30	24.977	1	0	0	0	0	0	0	3.15	4.56	205	16	25	5	60	6.04	139.5	3.91	28.7	0
3	71	1	2	97.3	123	2	101	20.7612	0	0	0	0	0	1	1	5.7	4.02	233	18	22	5.51	47	5.36	142.6	3.96	39.8	0
6	39	1	2	101.654	90	3	62	22.4913	0	0	0	0	0	0	0	5.1	5.43	177	28	18	4.89	80	5.37	140.8	4.15	41	0
1	62	1	2	76.976	15	3	5	25.2493	0	0	0	0	0	0	0	9.67	4.96	183	16	14	11.28	52	4.8	138.5	3.64	40.1	0
7	86	1	3	103.305	234	3	187	18.0802	1	0	0	1	0	0	0	6.23	3.84	153	9	27	4.03	120	2.52	141.9	4.22	36.6	1
3	49	0	2	104.653	165	1	102	23.0469	0	0	0	0	0	0	0	3.72	4.35	180	32	30	4.95	63	4.65	142.1	3.78	42.4	1
2	66	0	2	97.316	98	2	71	25.6312	0	0	0	1	1	1	0	5.72	4.17	142	17	20	5.28	49	2.98	140.5	3.01	39.8	1
2	54	0	2	107.638	82	2	62	20.202	0	0	0	0	0	0	0	4.69	4.45	171	21	18	5.81	55	7.7	141.7	4.02	41.8	0
3	70	1	2	96.644	186	2	123	18.6012	0	0	0	0	0	0	0	5.01	3.52	247	11	25	5	81	6.75	137.1	4.16	31.6	0
6	51	1	2	101.317	95	2	77	25.2595	0	0	0	0	0	0	0	8.15	4.55	184	36	41	5.81	61	5.67	140.7	4.35	42.6	0
2	70	1	2	117.974	128	3	88	21.2585	1	0	0	0	0	1	1	4.38	4.48	93	18	32	4.76	94	4.77	140.3	4.27	41.2	0
2	51	0	2	80.311	150	3	97	24.4646	0	0	0	0	0	0	0	4.93	4.14	123	17	27	4.24	61	5.98	139.9	3.85	43	0
7	58	1	2	84.313	255	3	103	26.4463	0	0	0	0	0	0	0	4.32	4.69	236	30	24	10.16	67	5.26	140.8	4.09	41.6	1
6	50	0	2	84.649	58	3	23	20.5761	0	0	0	0	0	0	0	4.76	4.23	187	15	20	5.19	40	3.45	140.1	3.79	38.6	0
6	18	1	1	99.647	42	3	24	16.9172	0	0	0	0	0	0	0	5.25	5.1	146	11	14	4.7	63	6.19	138.4	4.22	43.8	0
0	29	0	2	75.991	70	4	0	18.2183	0	0	0	0	0	0	0	5.36	4.46	268	12	13	4.91	62	2.72	140.5	3.82	41	0
7	71	0	2	80.316	305	3	121	17.4818	0	0	0	0	0	1	1	4.29	3.18	151	28	42	4.54	62	4.45	145.9	4.07	36.5	1
7	62	1	2	109.312	165	3	123	25.8645	1	0	0	0	0	0	0	8.7	4.69	125	13	18	4.79	72	5.6	138.5	4	41.6	0
3	67	1	2	106.309	266	2	218	21.6441	0	0	0	0	0	1	0	9.76	5.18	243	40	32	4.45	61	7.53	140	3.79	40.6	1
3	70	0	2	106.301	144	2	102	24.6094	0	0	0	0	0	0	0	6.86	4.36	167	35	36	4.98	39	5.86	141.5	4.45	41.7	0
1	51	1	3	96.655	203	2	155	16.3265	0	0	0	0	1	1	0	5.58	5.02	205	15	21	4.79	65	5.3	140.9	3.79	46.1	1
2	48	1	2	110.642	61	2	31	21.551	0	0	0	0	0	0	0	3.97	4.81	219	16	19	5.02	64	3.81	142	4.44	39.5	0
6	47	1	2	92.317	125	3	72	21.7993	0	0	1	0	0	1	0	9.83	5.15	180	32	30	5	81	5.17	148.9	3.98	38.9	0
3	52	1	2	84.648	118	2	60	19.9219	0	0	0	0	0	1	0	4.07	4.2	135	14	20	5.24	65	7.02	137.2	4.09	38.5	0
3	57	0	2	100.978	208	2	157	35.1562	1	1	0	0	0	0	0	7.11	4.66	225	19	19	6.28	38.8	4.91	141.9	3.35	38.8	0
0	25	0	1	96.647	30	1	0	17.6309	0	0	0	0	0	0	0	3.94	4.69	218	11	16	4.97	51	5.01	140.3	4.19	48.4	0
7	61	1	2	94.976	231	3	173	19.2234	0	0	0	1	1	1	0	3.29	3.93	132	16	38	6.1	48	5.8	141.2	3.7	41.8	0
1	75	1	3	109.634	35	2	18	18.7328	1	0	1	0	1	1	0	4.26	3.81	135	35	28	4.26	87	6.86	139.7	4.07	36.1	1
2	76	0	2	105.316	152	3	101	18.2222	0	0	0	0	0	0	0	4.96	3.7	195	14	23	5.09	71	4.55	142.2	4.31	36.9	1
1	25	1	2	86.989	76	3	47	17.9592	0	0	0	0	0	0	0	7.56	4.88	238	21	18	5.22	72	4.79	139.6	3.68	47.1	0
3	50	0	2	111.988	130	2	69	17.5431	0	0	0	0	0	0	0	5.19	5.17	218	45	40	4.57	59	3.8	139.5	3.99	40.9	0
2	63	0	2	112.309	111	2	54	20.1348	1	0	0	0	0	0	0	6.26	4.16	208	23	23	4.85	49	5.09	142.8	3.72	41.6	1
4	49	1	2	105.317	162	2	112	17.9931	0	0	0	0	0	0	0	7.78	4.83	220	20	30	4.73	65	5.88	141.7	3.89	40.9	0
7	75	1	2	111.969	321	3	112	19.9481	1	0	0	0	0	1	1	6.78	2.55	325	15	18	4.77	80	5.87	144.7	3.58	41.8	0
7	77	0	3	88.976	435	3	187	23.2335	0	0	1	0	0	1	0	3.75	3.88	186	10	15	5.2	69	5.81	143.6	3.35	37.6	1
7	56	1	2	104.648	286	3	86	20.7612	0	0	0	0	0	0	0	5.66	4.3	207	15	18	4.53	63	3.3	143	4.18	41.9	0
3	53	1	2	108.973	123	2	97	30.3673	1	1	0	0	0	0	0	5.07	3.82	169	30	25	13.09	82	7.49	135.3	3.54	40.5	0
2	64	1	3	112.309	125	2	76	23.4375	1	0	0	1	0	1	1	5.53	4.65	153	15	15	4.39	59	4.8	141.9	4.27	38.6	1
2	67	0	2	121.31	120	3	98	16.4444	0	0	0	0	0	0	0	4.53	4.43	163	28	22	5.51	63	5.41	142.6	4.32	42.9	0
2	43	0	1	93.653	96	2	67	21.6441	0	0	0	0	0	0	0	8.4	4.03	315	7	16	5.23	89	10.38	138.5	4.04	41.4	0
7	73	1	3	115.3	273	3	100	23.3355	0	0	0	0	1	0	1	4.76	4.43	122	33	25	5.37	73	4.62	141.6	3.47	38.1	1
7	59	1	2	101.303	367	3	152	23.9188	0	1	0	0	0	0	0	7.24	5.1	175	20	15	5.7	73	6.64	141.4	3.97	41.1	0
5	18	1	2	76.316	70	3	48	14.3637	0	0	0	0	0	0	0	5.96	4.64	160	17	16	4.96	59	4.54	141.8	3.96	42.3	0
3	54	0	2	122.305	103	2	53	20	1	0	0	0	0	1	0	4.03	4.15	182	10	18	5	52	6.6	143.5	4.25	41.7	1
7	76	0	2	125.633	470	3	157	21.4844	0	0	0	0	0	0	0	5.63	3.67	237	26	34	5.31	68	6.86	144.3	4.15	38.6	1
2	63	0	2	96.65	120	2	65	19.5312	1	0	0	0	0	0	0	4.21	2.77	200	22	18	7.58	94	6.38	143.6	4.47	35	0
3	68	0	2	88.31	178	2	117	27.6817	0	0	0	0	0	1	0	8.88	5.02	220	35	35	4.38	95	4.91	142.8	3.46	39.2	1
2	63	1	2	108.304	150	2	99	20.0692	1	0	0	0	0	0	0	3.92	4.86	207	26	27	5.23	60	6.07	145.2	3.21	42.8	0
3	75	1	2	98.964	156	2	102	17.6471	0	0	0	0	0	1	1	3.66	4.36	159	19	25	4.36	105	7.14	141.2	4.54	40.8	0
2	56	1	3	102.318	171	2	123	22.3863	1	0	0	0	0	1	1	12.42	3.91	104	28	27	5.22	82	6.6	137.8	2.99	34.3	0
7	64	0	2	111.306	121	3	77	19.9792	0	0	0	0	0	0	0	6.14	4.08	244	13	22	4.64	50	4.94	141.6	3.64	39.1	0
2	71	0	2	108.972	130	2	96	16.4446	1	0	0	0	0	0	0	6.49	4.45	191	8	18	5.85	81	4.52	144.3	4.56	45.7	0
1	22	1	2	81.647	45	3	30	18.6122	0	0	0	0	0	0	0	7.6	5.18	274	25	17	5.82	79	4.91	140.5	4.28	44.6	0
7	64	1	2	91.315	368	3	142	18.7328	0	0	0	0	0	0	0	4.46	4.71	186	12	27	4.66	106	4.84	138.2	4.35	40.1	0
7	71	1	3	85.324	290	3	134	22.3214	0	0	0	1	0	1	0	4.24	3.96	100	19	25	4.81	95	6.51	143	4.12	36.4	0
7	62	0	3	106.965	341	3	127	17.1875	0	1	0	1	0	1	0	3.37	3.8	83	16	19	6.7	37	2.64	145.6	3.56	38	1
2	53	0	2	97.304	70	2	30	17.7458	0	0	0	0	0	0	0	8.5	3.58	417	21	23	5.07	57	5.51	140.1	4.35	31.5	0
7	69	1	2	99.299	395	3	162	23.8367	0	1	0	0	0	0	0	6.75	4.44	167	18	14	7.65	61	5.13	140.8	3.79	38.4	0
3	54	1	2	121.978	177	2	121	23.6915	1	0	0	0	0	1	0	5.75	5.15	131	20	23	5.27	67	7.03	138.8	4.09	41.4	0
3	68	1	3	92.634	195	3	137	19.7232	0	0	0	1	0	1	0	2.82	4.29	105	22	19	5.4	90	5.2	145.2	3.96	41.9	1
8	51	1	3	112.97	46	1	21	23.1837	0	1	0	0	0	0	0	5.99	4.93	229	41	21	8.94	77	5.24	140.9	3.95	40.2	0
3	48	0	2	118.305	52	3	33	29.0533	0	0	0	0	0	0	0	5.04	4.82	235	14	15	4.75	10	3.86	135.8	3.91	41.3	0
7	75	1	2	105.961	330	3	128	21.6713	1	0	0	0	0	0	0	4.95	3.88	179	15	21	6.1	110	8.19	140.1	4.6	41	0
3	63	1	3	101.982	162	2	134	18.2098	1	1	0	1	0	1	0	7.71	5.16	120	61	23	6.44	40	3.67	146.5	3.62	36.3	1
3	62	1	2	102.65	122	2	100	17.128	0	0	0	0	0	0	0	6.63	4.24	228	16	18	4.57	58	6.16	140.6	3.73	41.3	0
3	64	0	2	103.981	184	2	165	33.305	0	0	0	0	0	0	0	3.94	4.17	130	38	31	6.37	55	5.14	141.2	4.06	39.1	0
7	74	1	3	109.649	219	2	108	23.3887	0	0	0	0	0	0	0	4.58	4.46	163	11	30	5.34	77	5.53	140.5	4	42.5	1
2	36	0	2	110.98	111	2	56	17.1875	0	0	0	0	0	0	0	4.19	4.21	210	11	20	4.47	49	4.42	141.2	3.94	44.3	0
3	64	1	2	103.32	139	2	110	19.0039	0	0	0	0	0	1	1	6.84	4.33	245	53	34	10.56	98	5.28	150	4.41	34.1	0
2	46	1	2	114.31	94	2	66	20.6852	0	0	0	0	0	0	0	3.48	4.49	199	10	10	4.76	63	8.25	144.8	4.29	37.8	0
7	80	1	3	104.633	533	3	209	15.4315	0	0	0	0	0	0	0	4.43	4.42	161	6	19	5.36	79	4.81	140.1	3.74	37.8	1
2	51	0	2	101.65	88	2	49	20.83	0	0	0	0	0	0	0	4.59	4.71	225	9	17	5.37	40	2.7	141.2	3.33	36.9	0
2	57	1	2	110.643	111	2	19	24.5675	1	0	1	0	0	0	0	4.84	4.71	187	22	21	4.95	60	6.75	143.1	3.92	40.9	0
2	72	0	2	104.981	148	2	105	15.1489	0	0	1	0	0	0	0	5.87	4.47	225	11	22	4.91	83	5.35	144.3	4	41.9	0
3	64	1	2	111.314	165	2	115	18.1252	1	0	0	0	0	1	1	13.92	4.23	153	16	16	5.26	62	4.6	143.2	3.75	34.5	1
6	29	0	1	73.984	51	2	40	18.662	0	0	0	0	0	0	0	5.55	4.1	191	17	19	4.02	45	2.64	140	4.03	39.7	0
7	65	0	3	112.645	305	3	135	20.7008	0	0	0	1	0	0	0	4.21	3.89	144	10	20	5.39	52	6.15	141.5	4.08	41.5	1
7	71	1	3	129.319	525	2	185	20.3125	0	0	0	1	1	1	0	2.6	3.99	83	89	102	4.9	78	5.26	140.6	4.11	38.7	1
3	62	0	3	111.972	188	2	175	21.6311	1	0	0	1	0	0	0	3.91	3.87	128	13	19	4.76	59	6.53	142.8	3.96	38.2	0
2	69	1	3	114.966	113	2	48	20.202	1	0	0	0	0	0	0	3.99	1.1	140	16	18	4.96	69	7.22	140.2	3.65	39.7	0
1	28	0	1	74.318	115	2	95	21.7193	0	0	0	0	0	0	0	6.49	4.85	197	14	18	4.81	48	3.81	139.3	4.08	45.8	0
3	56	1	2	111.298	144	2	105	19.3698	1	0	0	0	0	1	0	7.65	4.1	237	24	36	5.36	59	3.82	142.9	3.82	37.3	0
3	59	0	1	87.648	129	2	68	19.9219	0	1	0	0	0	0	0	4.67	4.6	216	13	14	6.67	40	5.08	143.8	3.92	43.9	0
4	68	1	2	106.965	200	1	129	24.7405	1	0	0	0	0	1	0	4.88	4.4	173	13	17	5.63	90	6.36	143.3	3.9	36.2	0
3	59	0	2	129.972	120	2	91	23.8751	0	0	0	0	0	0	0	5.69	4.56	177	35	26	5.89	60	3.83	141.5	4.03	41.8	0
1	42	1	2	89.652	61	2	55	24.4536	0	0	0	0	0	0	0	4.31	4.5	204	12	17	5.58	74	4.74	142.6	3.72	39.1	0
3	75	1	3	106.305	221	2	178	19.1001	1	0	0	1	0	1	0	3.76	4	152	11	21	4.79	51	4.83	140.5	3.78	37.8	1
7	78	1	2	123.306	300	2	119	22.719	1	0	0	0	0	0	0	7.71	4.92	158	40	29	6.27	100	9.24	145.1	4.02	43.4	0
3	68	1	2	104.648	209	2	135	21.7738	1	0	1	0	1	1	0	5.27	4.13	55	14	22	4.79	80	5.19	144	3.46	36.2	1
7	70	1	2	113.313	242	3	196	22.4323	0	0	1	0	0	0	0	5.6	4.89	173	21	25	5.15	71	5.91	140.3	3.96	49.2	0
1	36	1	2	85.647	65	2	23	22.2753	0	0	0	0	0	0	0	6.3	5.07	222	27	23	5.58	65	6.03	137.5	3.88	46.1	0
0	23	0	1	75.986	45	1	0	18.6709	0	0	0	0	0	0	0	6.72	4.73	249	16	24	5.03	54	4.46	141	4.17	50.8	0
3	72	1	2	123.637	138	2	87	19.8347	1	0	0	0	0	0	0	10.17	4.35	244	14	22	5.48	52	3.86	141.4	3.8	37	0
2	41	1	2	87.65	122	2	76	19.7232	0	0	0	0	0	1	0	6.19	5.64	202	11	16	4.24	71	5.68	140.4	3.94	42.1	0
3	50	1	3	132.957	171	2	156	27.6095	1	0	0	0	0	1	0	7.34	5.31	268	29	17	6.74	60	4.45	141.4	3.73	43.8	1
7	63	1	2	89.32	280	3	228	22.3214	0	0	0	0	0	0	0	5.4	4.21	165	23	29	6.16	64	5.86	136.9	3.55	43	0
1	19	1	1	66.656	58	3	18	14.5329	0	0	0	0	0	0	0	5.67	5.01	162	16	16	4.87	53	4.65	140.5	3.61	44.8	0
7	67	1	3	92.987	347	3	105	21.6128	0	0	0	0	0	1	0	5.03	4.47	167	18	23	4.79	68	5.57	144.5	4.43	41.7	1
7	52	1	2	111.642	360	2	173	20.0692	1	0	0	0	0	1	0	8.29	4.76	284	14	17	5.19	60	5.19	140	4.03	42.4	1
7	64	1	2	114.309	161	2	136	28.0404	1	0	0	1	0	0	0	6.95	4.7	156	16	17	6.7	96	6.05	142.1	3.78	44	0
7	68	0	2	101.643	305	3	148	17.7778	0	1	0	0	0	0	0	5.78	3.91	94	17	18	6.92	43	8.27	145.2	3.72	43.7	0
3	52	0	2	113.316	186	3	74	36.3636	1	0	0	0	0	0	0	6.93	4.84	262	21	23	5.8	54	4.99	141.9	4.26	43.8	0
2	56	1	2	123.976	153	2	104	25.565	1	1	0	0	0	1	0	8.65	4.81	113	20	16	7.63	66	4.27	139.9	3.97	42.8	0
7	66	1	2	99.315	390	3	158	19.6511	0	0	0	0	0	1	0	3.82	4.13	144	19	26	4.72	72	5.35	143.1	3.59	36.6	1
7	71	1	2	92.979	195	2	129	19.257	0	0	0	0	0	0	0	3.87	3.51	166	9	21	5.13	79	6.46	142.7	4.26	33.2	0
6	75	1	2	104.301	110	3	57	17.1029	0	0	0	0	0	0	0	3.75	4.46	147	10	24	5.14	79	6.01	143.6	4.38	43.2	1
7	68	1	2	122.648	313	3	292	19.2653	1	0	0	0	0	0	0	6.38	4.36	179	8	24	4.07	65	4.33	143.5	3.7	38.2	1
0	21	0	1	81.653	56	4	0	18.3391	0	0	0	0	0	0	0	5.81	4.66	249	12	20	5	58	7.71	140.5	4.15	48.2	0
1	24	1	2	106.649	61	2	17	19.79	0	0	0	0	1	0	0	6.85	5.41	216	31	24	5	49	3.56	143.8	4.31	38	0
2	55	0	2	122.965	110	2	85	24.093	1	0	0	0	0	1	0	4.28	3.85	203	23	17	5.23	57	6	145.7	4.18	39.1	0
7	73	0	3	108.976	375	3	166	25.3333	0	0	0	0	0	0	0	4.93	3.96	202	9	19	4.63	58	5.86	144.6	4.32	40.9	1
3	75	1	3	123.305	240	2	188	22.4913	1	1	1	0	0	1	0	5.91	4.24	112	26	23	5.76	68	6.2	147.5	3.48	42.8	1
3	54	0	2	91.98	215	2	135	18.7305	0	0	0	0	0	0	0	2.9	3.9	134	9	15	4.16	54	6.57	145.5	4.08	36.9	0
7	61	0	2	94.644	269	3	74	19.5312	0	0	0	0	0	0	0	4.19	4.54	212	8	17	4.59	61	5.47	142.1	3.59	39	0
7	64	0	2	118.631	338	3	138	21.4844	0	0	0	0	0	0	0	7.67	4.22	207	14	17	3.88	54	4.14	142.6	4.39	43.1	0
2	37	0	1	74.987	82	2	45	19.8347	0	0	0	0	0	0	0	6.92	4.26	300	11	16	5.15	48	5.17	139.2	3.92	44.8	0
3	66	0	2	107.296	190	3	123	17.1163	0	0	0	0	0	0	0	5.59	4.24	198	11	21	4.9	62	5.81	141.2	4.72	46	0
1	21	1	1	101.315	56	3	19	18.1018	0	0	0	0	0	0	0	9.7	4.77	241	21	25	5.39	64	3.87	139.8	4.4	48.1	0
1	16	1	2	88.653	45	2	16	15.9386	0	0	0	0	0	0	0	6.75	4.42	299	14	16	4.88	51	4.47	139.6	3.83	41.3	0
0	28	0	1	89.656	50	1	0	18.1061	0	0	0	0	0	0	0	7.74	4.34	274	7	16	4.59	44	4.21	140.6	3.97	46.2	0
7	68	1	2	110.976	150	3	95	24.0741	0	0	0	0	0	1	0	5.41	4.39	229	22	20	4.69	69	4.7	146.9	3.81	39.4	0
7	85	1	3	89.318	444	3	145	21.9713	1	0	0	0	0	0	0	3.15	3.68	222	12	22	4.64	64	5.54	145.8	3.75	33.6	1
2	57	0	2	97.321	105	2	72	20.3125	0	0	0	0	0	0	0	4.04	4.26	166	11	24	4.9	51	3.93	141.9	3.96	38.4	0
7	56	1	2	114.319	289	3	105	24.8016	0	0	0	0	0	0	0	4.45	5.46	131	9	15	6.91	60	4.87	141.4	4.25	42.8	0
7	78	1	2	102.312	355	3	123	15.7038	0	0	0	0	0	0	0	4.44	4.38	81	17	23	4.18	61	4.17	140.7	4.2	38.5	0
2	64	0	2	77.65	127	2	98	22.0604	0	0	0	0	0	0	0	5.79	4.19	109	13	20	4.81	48	5.41	144.2	3.84	37.6	1
3	67	1	2	110.313	151	3	113	22.2291	1	0	0	0	0	0	0	9.82	4	140	15	16	4.66	61	5.45	143.9	3.17	37.3	0
6	53	0	2	93.651	65	3	40	19.1406	0	0	0	0	0	0	0	5.97	4.4	247	11	21	5.46	53	3.06	143.9	4.03	38.3	0
8	22	0	2	83.324	74	3	49	16.6335	0	0	0	0	0	0	0	3.34	4.13	262	7	17	4.57	44	4.11	139	3.73	43.4	0
6	78	0	3	103.982	113	3	51	24.8889	0	1	0	0	0	0	0	7.54	5.01	262	20	41	5.51	59	3.91	146.9	3.84	37.4	0
3	70	0	2	115.303	220	2	152	23.8751	1	0	1	0	0	0	0	6.21	4.5	146	33	37	4.7	68	6.2	143.2	3.91	45.8	0
2	52	1	2	105.647	165	2	140	29.4118	1	0	0	0	0	1	0	7.47	3.97	235	107	40	6.5	56	6.08	139.7	3.91	38.6	0
1	29	1	2	87.321	55	3	22	17.6309	0	0	0	0	0	0	1	6.02	4.34	237	34	26	4.93	58	5.13	141	3.94	42.4	0
3	48	0	1	105.656	116	2	42	23.0469	0	0	0	0	0	0	0	4.28	4.17	227	6	18	4.95	62	4.95	142.2	5.12	44.7	0
7	85	0	2	104.638	218	3	148	19.9762	0	0	0	0	0	0	0	4.64	3.16	195	9	25	4.61	85	4.76	145	4.89	38.3	0
3	78	1	2	106.976	250	2	182	23.8751	1	0	1	0	0	0	0	7.05	4.7	186	40	36	5.12	86	4.3	146.6	4.23	40	0
3	62	1	2	119.294	180	2	132	18.6851	0	0	0	0	0	0	0	5.66	4.13	200	15	19	4.83	68	4.88	141.8	3.78	38.7	0
1	51	1	3	108.977	91	2	43	24.2031	1	0	0	0	1	1	1	7.2	4.67	252	23	23	4.69	69	4.12	140	3.97	39.6	0
6	53	0	2	110.644	70	3	48	21.4309	0	0	0	0	0	0	0	3.59	3.96	173	14	22	5.34	59	3.66	142.4	3.61	43	0
0	19	1	1	105.653	59	4	0	22.8395	0	0	0	0	0	0	0	7.55	5.12	273	20	18	4.86	84	3.33	142.3	3.86	47.2	0
3	56	1	2	112.656	185	2	147	26.8136	0	1	0	0	0	1	0	4.77	4.9	197	23	20	7.98	82	8.44	139.6	5.26	45.4	0
3	69	1	2	105.975	195	2	152	23.8751	0	0	0	0	0	0	0	8.55	4.18	161	31	26	4.8	74	3.96	136.8	4.54	43.8	0
3	56	0	2	95.974	145	2	128	26.079	0	0	0	0	0	0	0	5.33	4.41	164	15	18	6.35	64	5.59	141.7	3.8	39.3	0
7	64	0	2	90.985	256	3	101	20.3954	0	0	0	0	0	0	0	4.13	3.91	132	19	25	4.27	55	2.2	146.3	3.07	36.4	0
7	74	1	3	88.981	297	3	115	18.5901	0	0	1	1	0	1	0	7.64	5.2	182	17	27	4.84	77	3.78	142.1	3.57	44.8	1
2	55	1	2	110.319	172	3	127	21.7993	0	0	0	0	0	0	0	8.03	4.67	177	57	35	4.8	73	5.44	143.7	3.97	45.4	0
3	58	1	2	105.645	118	2	63	17.6471	0	0	0	0	0	0	0	5.47	4.03	158	32	36	4.72	74	5.34	140.2	4.23	41.1	0
7	56	0	2	88.32	395	3	138	24.9989	0	0	0	0	0	0	0	3.95	4.43	324	14	22	5.64	68	5.84	142.6	4.14	46.2	1
6	55	0	2	106.314	140	3	87	25.1039	1	0	0	0	0	0	0	5.09	4.65	239	16	20	4.57	64	5.56	145.1	4.06	41.3	0
5	59	1	3	95.647	215	3	183	24.2215	0	0	0	0	1	1	0	5.35	4.81	132	63	54	5.23	79	4.82	142.7	4.27	46.2	0
3	62	1	3	114.633	95	2	69	24.2188	1	0	0	0	0	0	0	5.45	5.04	114	17	27	4.2	88	5.58	139.7	4.02	34.3	0
2	52	1	3	96.655	105	2	55	23.3564	1	1	0	1	0	1	1	5.38	4.16	152	23	25	6.5	85	6.88	139	3.37	46	0
2	46	0	2	98.981	198	2	161	19.8347	0	0	0	0	0	0	0	5.7	4.02	158	12	15	4.68	37	2.5	140	4	33.4	0
7	48	1	2	95.642	114	3	72	22.4323	0	0	0	0	0	1	0	7.43	4.81	143	17	21	5.11	73	4.8	141.8	3.58	21.5	1
3	64	0	2	111.976	219	2	166	25.2081	0	0	0	0	0	0	0	5.38	3.84	235	24	33	5.35	48	4.08	142	4.08	40.1	0
2	64	0	2	108.31	120	2	56	23.7387	0	0	0	0	0	0	0	4.29	4.09	133	15	21	5.47	63	3.95	145.6	3.98	44.4	0
1	82	1	3	91.317	101	2	34	26.7755	1	0	0	0	1	0	0	9.29	5.15	154	10	14	5	78	8.27	144.3	3.77	31.2	1
3	71	0	2	124.295	232	2	196	23.4375	1	0	0	0	0	0	0	6.12	3.99	193	10	16	4.93	55	7.01	143	3.99	38.3	0
2	52	1	2	94.98	68	3	32	25.8264	0	0	0	0	0	0	0	6.25	4.53	276	28	20	4.95	74	7.12	142.1	4.32	37.2	0
8	48	1	2	118.639	122	3	66	26.0417	0	0	0	0	0	0	0	13.09	4.63	294	15	16	5	70	7.28	139	4.3	36.2	0
3	39	1	2	95.652	38	2	23	22.9854	0	0	0	0	0	0	0	6.88	5.38	109	31	28	4.52	70	6.3	140	3.81	46.1	0
7	57	1	2	111.979	270	3	90	21.875	0	0	0	0	0	1	0	5.42	4.31	275	11	15	4.94	68	6.57	140.8	4.15	37.4	0
2	57	0	2	116.974	120	2	67	24.8358	0	0	0	0	0	0	0	3.53	4.39	165	12	18	5.6	63	6.1	143.4	3.64	39.6	0
7	57	1	2	92.972	355	3	202	20.0692	0	0	0	0	0	0	0	7.31	4.52	407	0	14	4.56	53	4.67	137.9	4.23	40.1	1
3	52	1	3	126.984	131	2	68	19.8347	1	0	0	0	0	0	0	5.19	4.58	125	37	43	5.02	119	9.51	141	4.26	35.8	0
7	81	0	3	108.641	370	3	202	22.6667	1	0	0	1	0	0	0	4.14	3.31	139	41	55	4.85	61	4.58	142.9	3.58	36.4	1
5	49	0	1	103.978	224	2	187	23.0469	0	0	0	0	0	0	0	3.33	4.15	146	33	31	4.75	44	3.26	139	3.41	39.1	0
7	49	1	2	94.65	440	3	170	23.5294	0	0	0	0	0	0	0	7.39	4.83	207	18	21	4.71	58	6.45	141.4	4.02	39.7	0
7	78	1	2	87.651	245	3	188	18.026	1	0	0	0	0	1	1	6.93	4	229	10	27	4.79	82	7.16	140.9	3.76	30.1	0
8	55	1	2	103.642	65	2	22	27.3588	0	0	0	0	0	0	0	7.73	3.59	200	24	18	4.29	230	11.18	142	4.6	39.7	0
3	74	0	2	118.639	165	2	112	20.4518	1	0	0	0	0	0	0	2.71	3.78	130	10	22	4.74	61	5.76	143.9	3.85	38.9	1
3	45	1	1	108.986	76	2	31	23.1206	0	0	0	0	0	1	0	7.52	5.79	192	22	22	5.35	71	8.66	141.4	4.25	45.3	0
1	20	0	2	89.644	42	3	12	17.0562	0	0	0	0	0	0	0	7.89	4.36	261	7	15	3.98	60	3.99	136.2	3.91	42.3	0
1	48	0	2	73.32	124	2	34	22.2222	0	0	0	0	0	0	0	5.36	4.59	195	11	19	4.65	56	6.69	139.2	3.33	39.8	0
2	43	0	1	98.641	139	2	86	17.7999	0	0	0	0	0	0	0	4.3	3.74	187	10	18	5.26	59	4.82	139.8	4.18	38.2	0
2	76	0	2	114.64	190	2	134	28.7201	1	0	0	0	0	0	0	6.47	3.84	170	11	19	5.65	46	5.15	145.9	3.06	38.1	0
2	24	1	2	97.32	114	2	56	18.6709	0	0	0	0	0	0	0	4.3	4.82	132	26	21	4.24	75	4.95	140.1	4.88	46.5	0
2	57	0	2	120.982	115	2	79	21.2279	0	0	0	0	0	0	0	5.47	4.15	247	15	17	5.24	80	5.5	147.4	3.72	36.1	0
2	57	0	2	111.647	75	2	50	24.1415	0	0	0	0	0	0	0	5.16	4.4	216	17	16	6.56	58	5.56	141.2	3.5	33.9	0
2	46	1	2	101.97	79	3	32	22.9819	0	0	0	0	0	0	0	4.18	5.49	165	18	15	5.14	67	7.13	140.6	4.07	44.9	0
3	71	1	3	101.314	315	2	256	18.75	1	0	0	1	0	1	0	10.68	3.53	280	47	34	5.67	54	5.66	136.7	4.07	33.4	1
7	74	1	3	124.975	139	1	57	22.4913	1	0	0	0	0	1	0	9.94	2.84	205	8	11	4.93	83	15.41	139.9	4.44	29.5	1
3	67	1	3	118.311	179	2	145	26.7229	1	0	0	0	0	0	0	7.22	4.51	162	23	21	5.64	66	7.13	142.3	3.93	40.5	1
2	43	0	1	96.647	76	2	23	22.8889	0	0	0	0	0	0	0	3.5	4.27	191	35	31	5.3	42	4.96	139.7	4.13	40.8	0
2	66	0	3	113.967	150	2	115	21.0938	1	0	0	0	0	0	0	5.84	4.17	299	17	20	6.17	56	5.22	144.2	4.17	44.1	1
7	66	1	2	109.313	382	3	145	22.3133	0	0	0	0	0	1	1	4.4	3.87	124	10	21	3.96	68	4	141	3.29	34.9	0
3	66	0	2	108.313	245	2	186	19.1406	1	0	1	0	0	0	0	5.13	4.65	197	16	20	5	52	6.19	145	4.44	47.2	1
2	34	0	2	108.315	80	2	35	24.1288	0	0	0	0	0	0	0	6.63	4.03	182	22	20	4.66	45	5.39	140.3	3.93	39.4	0
3	57	0	2	124.974	320	2	278	27.0538	1	0	0	0	0	0	0	5.08	3.77	190	27	24	6.01	50	6.53	145.6	3.67	40.5	0
3	79	1	3	106.652	174	2	155	25.5102	1	0	0	0	0	0	0	6.22	4.67	157	24	23	4.99	68	6.4	140.2	4.15	36.9	0
6	31	1	2	94.294	101	3	75	19.7133	0	0	0	0	0	1	0	6.04	4.72	192	9	16	5.08	65	3.86	140.3	4.25	42.1	0
2	80	1	3	107.298	56	2	33	27.7551	0	0	0	1	0	0	0	2.91	3.15	101	20	23	4.79	144	6.7	140	4.58	33.9	0
3	69	1	2	105.967	150	2	98	20.0796	1	0	0	0	0	0	0	4.92	4.06	281	16	18	6.3	54	4.49	140.6	4.09	38	0
2	65	1	2	111.973	175	2	123	23.2438	1	0	0	1	0	1	0	8.36	4.75	168	21	15	5.49	72	7.7	141.4	4.09	43.7	1
3	53	0	3	97.645	90	2	67	24.3141	1	0	1	0	0	1	0	6.55	4.41	288	11	17	7.11	77	6.74	140.6	3.58	38.6	0
2	70	1	2	83.978	245	2	177	23.4375	0	0	0	1	0	0	0	7.48	4.92	113	35	26	3.87	74	7.05	143.6	3.87	39.4	0
5	44	0	2	82.983	145	3	67	19.9481	0	0	0	0	0	0	0	3.03	3.42	117	18	23	5.55	44	1.66	140.7	3.21	34.1	0
6	49	1	2	94.983	341	2	328	24.9202	0	0	0	0	0	0	0	7.49	4.37	330	14	16	6.83	48	6.08	140	4.06	40.4	0
5	36	1	3	117.98	130	3	67	25.4694	1	0	0	0	0	1	0	5.7	5.06	255	22	20	4.95	80	5.29	142.3	4.22	46.3	1
1	52	0	2	103.319	100	2	53	26.8136	0	0	0	0	0	0	0	5.66	4.01	168	23	24	4.51	46	4.69	140	4.27	41.4	0
7	62	1	3	120.302	346	3	162	23.5304	1	0	0	0	0	1	0	4.48	4.09	152	11	23	4.62	57	6.57	139.9	3.5	40.4	1
3	55	0	2	117.973	132	2	88	22.2656	1	0	0	0	0	0	0	8.79	4.44	215	18	17	5.13	63	3.87	143.6	3.87	42.7	0
2	71	1	3	100.299	56	3	19	19.6752	1	0	0	0	1	1	0	3.89	4.21	177	11	20	4.49	60	6.25	141.6	4.21	36.3	1
3	71	1	3	106.984	111	2	88	20.3727	0	0	1	0	0	0	0	7.79	5.01	220	121	59	5.96	80	6.05	143.1	4.22	44.7	1
3	67	1	3	105.976	185	2	165	29.668	1	0	0	1	0	1	0	8.72	5.02	177	21	26	5.51	88	5.19	141.4	4.47	40.3	1
3	56	1	2	90.978	192	2	160	22.5309	0	0	0	0	0	0	0	5.8	4.29	210	20	21	5.39	75	6.47	143.1	3.99	43.4	0
6	26	0	2	108.981	222	2	199	30.4498	1	0	0	0	0	0	0	8.3	5.1	246	18	20	6.45	71	7	143.2	3.31	39.9	0
3	62	0	2	111.977	285	3	244	27.6304	0	0	0	1	0	0	0	6.42	3.94	127	22	29	6.47	66	5.36	148.6	4.44	37.4	0
2	68	1	2	68.986	145	2	88	23.3887	0	0	0	0	0	0	0	4.65	4.66	150	28	38	5	86	6.57	146.6	3.42	28.6	0
3	44	1	2	103.98	233	2	165	21.7181	0	0	0	0	0	0	0	6.49	5.05	249	21	21	6.2	73	4.13	143.2	3.98	47.6	0
3	75	0	2	109.976	182	2	128	20.9321	1	0	0	0	0	0	0	6.75	4.63	220	11	20	4.75	56	5.71	142.4	3.9	40.3	0
3	41	0	2	77.658	165	2	75	23.2434	0	0	0	0	0	0	0	5.13	3.96	155	14	17	4.68	58	4.15	142	4.01	40.8	0
2	70	0	2	97.641	85	3	35	17.4747	0	0	1	0	0	0	0	3.56	3.59	65	15	29	5.15	56	4.95	144.6	4.27	43.1	0
6	22	0	2	83.987	170	2	102	19.3359	0	0	0	0	0	0	0	6.5	4	217	16	13	5.32	52	5.3	142.7	3.57	47.7	0
8	48	0	2	79.65	83	3	126	20.83	0	0	0	0	0	0	0	3.71	4.61	242	16	23	5.29	61	5.51	145	4.63	45.3	0
7	65	1	2	112.976	267	2	161	24.6181	1	0	0	0	0	0	0	4.5	4.07	153	26	19	4.67	107	5.97	144.4	3.79	37.3	0
7	65	1	2	111.305	325	2	125	24.2188	0	0	0	0	0	0	0	3.45	4.22	129	19	30	4.87	56	5.52	145.6	3.67	38.7	0
2	72	1	2	115.629	141	2	120	24.4418	0	0	0	0	0	0	0	9.52	4.37	229	16	25	6.51	79	7.33	141.6	4.26	45.2	0
2	40	0	2	98.971	138	2	134	20.9572	0	0	0	0	0	0	0	8.37	4.41	236	10	17	4.51	60	2.96	141.3	4	45.2	0
6	57	1	2	109.312	86	2	30	21.3039	0	0	0	0	0	0	0	5.33	4.5	224	14	29	4.83	52	4.51	141.8	2.92	36.8	0
7	52	1	2	101.312	331	3	202	23.0469	1	0	1	0	0	1	1	6.19	4.53	216	20	24	5	54	4.99	143.8	3.87	37.9	0
2	67	0	3	113.638	81	2	62	23.2422	1	0	1	1	0	0	0	5.81	3.93	181	9	13	5.72	64	5.75	147.3	4.01	43.2	0
7	71	0	2	106.966	238	2	101	18.3594	1	0	0	0	0	0	0	2.78	4.05	145	10	22	5.55	54	6.41	142.8	4.26	44.5	0
7	54	1	2	99.634	393	3	104	22.0386	0	0	0	0	0	0	0	5.09	4.69	137	158	75	10.83	68	4.41	140.1	4.05	35.7	0
3	76	1	3	83.97	218	2	132	24.9135	1	0	1	0	1	0	0	7.24	3.88	229	32	25	5.08	55	4.39	140.9	3.41	32.6	1
3	30	1	2	102.981	55	2	40	19.5918	0	0	0	0	0	0	0	6.51	3.98	220	12	15	4.84	70	3.7	142.8	4.03	41.1	0
7	72	0	3	140.64	446	3	209	27.8159	0	0	0	1	0	0	0	5.07	4.36	223	9	15	5.87	50	3.58	144.3	4	42.4	1
3	78	1	2	134.298	135	2	100	27.8159	0	0	0	0	0	0	0	8.22	4	245	19	44	5.09	63	4.94	143.3	3.54	36.1	0
2	63	1	3	124.31	84	2	55	27.4587	1	1	0	1	0	1	0	6.12	4.35	269	14	21	7.74	75	4.29	143.3	3.97	34.7	1
6	56	1	2	94.983	76	2	65	25.7959	0	0	0	0	0	0	0	3.96	5.16	186	61	43	7.44	69	4.95	140.8	4.57	49.8	0
7	71	1	2	91.988	419	3	222	20.202	0	0	0	0	0	1	0	5.29	3.93	226	23	29	4.94	70	4.72	143.2	4.47	44.4	0
7	77	1	2	103.645	170	1	105	25.3444	1	0	0	0	0	0	0	5.04	4.93	298	10	24	5.18	87	6.37	142.8	3.68	36.7	0
2	62	1	2	92.966	156	2	132	23.8895	0	0	0	0	0	0	0	4.25	3.99	112	18	21	4.92	60	4.86	139	3.8	39	0
2	69	0	3	94.309	85	2	33	18.7305	1	1	0	1	0	0	0	8.64	3.9	223	11	26	5.01	59	4.99	142	4.1	44.5	0
2	51	0	2	99.975	172	2	140	23.5294	0	0	0	0	0	0	0	4.72	3.7	201	12	21	5.78	57	5.11	140.6	3.91	40.8	0
7	68	1	2	83.983	285	3	210	21.551	0	0	0	0	0	0	0	9.15	3.86	256	2	9	6.29	80	4.49	141	3.62	37.1	0
2	64	1	2	97.645	70	2	41	18.7328	0	0	0	0	0	0	0	5.84	4.25	215	17	25	5.52	50	4.76	142.4	4.35	46.5	0
2	75	1	3	116.31	112	2	58	23.4375	1	0	0	0	0	1	0	9.51	2.5	255	17	22	4.07	68	14.69	139.8	3.74	29.3	1
2	23	0	2	117.304	73	2	43	27.4598	0	0	0	0	0	0	0	6.21	5.49	129	20	23	4.49	71	4.18	144	4.24	49.6	0
6	54	0	2	79.313	95	2	66	27.6304	1	0	0	0	0	0	0	4.94	4.26	250	55	35	5.07	43	5.36	143.1	4.27	42.9	0
2	48	0	3	83.651	85	2	54	21.2084	0	0	0	0	0	0	0	5.68	3.6	272	13	22	4.89	48	3.62	143.8	4.11	37.7	0
2	64	1	2	131.31	90	2	55	24.2215	1	0	0	0	0	0	0	6.23	4.78	123	46	29	7.45	73	6.65	143.4	3.91	41.3	0
3	67	1	2	91.987	267	2	237	20.8307	0	1	0	0	0	1	0	7.15	4.79	224	22	24	7.85	52	6.01	139.3	4.04	37	0
6	46	0	2	53.986	60	2	48	17.9982	0	0	0	0	0	0	0	4.55	4.28	227	10	17	5.18	48	4.37	142.6	4.3	46.4	0
3	65	1	2	105.325	140	2	86	23.8884	0	0	0	0	0	1	0	6.07	5.58	241	18	20	5.9	67	5.56	143.1	4.18	45.3	0
2	45	0	2	92.989	87	2	82	22.8928	0	0	0	0	0	0	0	4.73	4.23	161	14	17	5.31	46	3.06	141.3	4.13	42.2	0
8	66	1	3	92.976	137	2	107	22.1367	0	0	0	0	0	1	0	9.44	3.21	312	15	20	6.06	66	5.53	139.1	3.97	29.5	1
3	68	1	2	117.309	281	2	208	24.0882	1	0	0	0	0	1	0	6.22	4.45	154	10	25	5.55	71	5.42	147.6	4.36	41.2	0
8	57	0	3	104.32	115	3	109	29.9688	0	0	0	0	0	0	0	8.89	3.58	185	22	16	5	34	6.26	142.7	4.11	33.1	0
2	52	1	2	100.968	130	2	78	23.9869	0	0	0	0	0	1	0	6.26	4.09	197	13	19	4.95	62	5.64	141.9	3.15	35.9	0
7	65	1	2	115.64	332	3	127	23.1405	0	0	0	0	0	1	0	4.13	4.1	130	18	25	5.57	62	4.4	143.2	3.55	45.7	1
7	55	0	2	93.971	351	3	202	17.4818	0	0	0	0	0	0	0	6.26	4.15	193	12	16	4.79	63	6.33	142.2	4.2	42.2	0
3	55	0	2	99.652	109	2	62	23.3091	0	0	0	0	0	0	0	4.71	3.35	200	9	19	4.62	43	6.11	142.2	4.25	41.6	0
3	42	1	2	122.658	174	2	126	30.7787	1	0	0	0	0	0	0	6.96	5.05	275	36	21	4.52	71	7.32	140.9	4.26	42.7	0
3	50	1	2	130.305	114	2	54	25.0593	0	0	0	0	0	0	0	6.77	3.94	185	32	23	4.94	60	6.19	142.8	4.04	42.5	0
2	49	0	2	116.317	159	2	127	24.2439	0	0	0	0	0	0	0	5.34	4.22	266	13	20	4.65	45	3.42	142.7	3.82	39	0
2	27	0	2	97.987	47	2	21	20.5457	0	0	0	0	0	0	0	5.79	4.45	338	20	19	5.63	52	3.35	140	3.82	45.8	0
3	51	1	2	114.985	128	2	56	21.7993	0	0	0	0	0	0	0	5.86	3.76	221	17	20	4.86	62	4.34	139.8	3.65	35.5	0
2	55	1	2	89.639	175	2	121	23.8754	0	0	0	0	0	1	0	4.66	4.84	213	19	20	5.76	76	5.77	140.1	3.99	46.8	0
7	70	1	2	116.635	403	3	135	21.9363	0	0	0	0	0	0	0	7.05	3.93	296	21	22	5.05	53	6.77	139.2	4.13	32.7	0
7	64	1	2	120.312	255	3	203	20.0184	0	0	0	0	0	1	1	4.55	3.79	143	9	23	4.85	55	4.93	141.6	3.59	39.5	1
3	81	1	3	105.299	214	3	152	20.3074	0	0	0	0	1	1	0	4.15	3.71	107	8	29	5.03	72	6.9	141.7	4.41	36.4	1
6	54	0	2	107.645	103	2	58	23.634	0	0	0	0	0	0	0	4.59	4.08	201	13	22	7.05	48	4.61	141.7	4.44	41.3	0
3	83	1	2	89.65	154	2	99	18.8189	1	0	0	0	0	1	0	27.26	3.85	442	66	50	3.4	61	5.2	137.7	4.17	24.8	0
7	72	0	2	89.633	375	3	106	20	0	0	0	0	0	0	0	4.47	3.68	101	20	20	5.79	43	7.03	143.1	3.6	42.1	1
2	71	1	3	101.978	104	3	57	18.3655	0	0	1	0	0	1	0	10.54	4.22	257	29	19	4.91	52	4.34	141.4	3.88	38.8	1
3	76	0	3	124.287	128	2	122	23.1111	1	0	0	0	0	1	0	5.85	3.97	270	12	18	4.97	41	4.11	140.7	4.24	38.5	0
3	53	1	2	105.321	130	2	68	19.1327	0	1	0	0	0	0	0	4.64	3.87	174	11	16	5.49	59	7.92	142.2	4.65	44.3	0
2	37	1	2	82.98	85	2	40	24.2215	0	0	0	0	0	0	0	4.14	4.71	143	16	25	5.02	57	5.67	140.5	4.31	42.6	0
1	17	1	2	80.65	47	3	12	16	0	0	0	0	0	0	0	8.67	4.19	332	6	13	5.18	76	2.57	143.5	3.63	38.3	0
8	52	1	2	80.321	107	2	75	19.2672	0	0	0	0	0	0	0	8.99	4.14	240	14	17	4.72	48	4.39	143.6	3.92	34.4	0
2	84	0	2	107.964	90	2	68	25.1039	1	0	0	0	0	0	0	5.5	3.82	239	9	19	5.6	44	6.7	142.6	3.25	38	0
8	30	1	2	97.654	84	3	65	19.5918	0	0	0	0	0	0	0	7.38	4.93	200	9	16	4.42	65	4.77	139.6	3.99	46.4	0
2	49	1	2	116.645	192	2	145	25.0135	0	0	0	0	0	1	0	4.46	4.75	150	15	18	5.47	89	3.05	142.8	3.98	39.4	0
7	67	1	2	91.984	410	3	195	21.5451	0	0	0	0	0	0	0	5.58	4.32	198	10	19	4.75	59	5.87	144	3.76	35.8	0
2	51	0	2	85.651	82	2	77	23.7118	0	0	0	0	0	0	0	4.22	4.23	193	13	18	4.59	73	7.1	142	4.57	36.8	0
7	68	1	2	91.983	420	3	152	19.1001	0	0	0	0	0	0	0	8.23	4.12	233	11	25	5.53	65	5.79	139.9	4.21	38.1	1
1	71	0	3	122.647	105	3	76	20.9275	1	0	0	0	0	0	0	9.31	4.4	538	14	19	5	51	4.07	143.3	4.14	38.8	1
3	54	0	2	84.649	200	2	168	22.4766	0	0	0	0	0	0	0	5.73	4.16	208	22	16	5.34	46	5.83	138.6	4.53	36.9	0
3	79	0	2	120.319	162	2	147	16.6493	0	0	1	0	0	0	0	5.84	3.96	174	19	21	7.52	69	4.96	140.8	3.6	36.6	0
2	49	0	2	86.975	155	2	135	24.8358	0	0	0	0	0	0	0	4.14	4.15	193	6	10	5.4	50	5.33	140.6	4.22	37.3	0
3	66	1	2	89.655	175	2	133	23.3887	0	0	0	0	0	0	0	7.55	5.45	176	12	12	4.34	79	5.24	142.7	3.82	39.2	1
1	56	1	3	89.319	156	2	122	20.3816	0	0	0	0	1	1	0	4.52	3.82	158	8	15	4.47	42	4.99	140.5	3.91	32	1
2	47	0	2	95.64	164	2	126	18.9745	0	0	0	0	0	0	0	4.76	4.51	197	9	13	5.08	40	5.03	139.7	4.05	38.9	0
2	35	0	2	66.979	185	2	132	16.5289	0	0	0	0	0	0	0	4.77	3.74	182	16	18	4.47	43	5.93	139.8	3.55	48.5	0
1	37	1	2	94.308	110	3	55	15.0204	0	0	0	0	0	0	0	4.11	4.03	146	10	15	4.61	60	6.6	142.9	3.84	43	0
7	57	1	2	113.315	394	3	125	25.6896	0	0	0	0	0	1	0	5.92	4.25	247	10	15	5.24	56	4.49	139.4	4.21	36.9	0
3	61	1	2	98.314	128	2	65	22.3094	0	0	0	0	0	0	0	7.1	4.84	168	33	25	4.66	81	6.14	140.2	4.26	43.2	0
2	65	1	2	130.977	75	3	45	20.0474	0	0	0	0	0	0	0	5.68	3.98	178	10	18	4.77	62	5.08	142.1	4.15	35.3	0
7	61	1	2	104.317	355	3	109	22.3081	0	0	0	0	0	1	1	6.25	4.54	129	44	34	4.57	56	6.82	139.3	3.71	38.3	0
3	76	0	2	101.976	110	2	88	25.8065	0	0	0	1	0	0	0	8.73	3.95	166	107	80	5.99	52	3.17	141.9	3.84	41.5	0
7	55	1	2	90.985	445	2	208	21.6713	0	0	0	0	0	1	0	6.54	4.41	195	9	14	4.72	69	4.55	141	3.98	31.7	1
2	52	0	2	82.986	98	2	81	21.3675	0	0	0	0	0	0	0	4.64	4	157	14	21	4.71	46	5.44	142.9	3.88	42.1	0
2	41	0	2	95.973	214	2	172	20.5457	0	0	0	0	0	0	0	4.78	4.05	202	7	17	4.39	42	5.61	138.7	4.19	41.8	0
2	67	1	2	104.643	110	2	81	24.2424	0	1	0	0	0	0	0	5.43	4.82	149	37	24	6.79	77	10.11	139.9	4.13	42	0
2	65	1	2	116.972	86	2	41	22.1453	1	0	0	0	0	0	0	7.5	4.72	197	32	36	5.32	71	10.17	141.3	3.87	45.1	0
3	58	1	2	123.305	200	2	151	24.3418	0	0	0	0	0	0	0	5.09	4.51	147	25	20	5	56	4.55	141.3	4.25	40.6	0
6	48	0	2	125.97	74	2	69	26.7229	1	0	0	0	0	1	0	4.06	4.18	165	20	21	4.5	42	4.17	140.9	4.16	37.8	0
3	37	1	2	104.641	175	2	128	26.7949	0	0	0	0	0	0	0	6.84	4.55	151	98	46	4.95	58	4.08	142	4.07	41	0
2	78	1	2	118.31	82	2	35	17.4191	0	0	0	0	0	0	0	3.29	3.71	108	11	24	4.21	64	4.72	139.6	3.81	38	0
2	65	1	2	133.313	196	2	135	23.8367	1	0	0	0	0	0	0	4.02	4.59	187	38	35	5.19	56	8.63	139.6	4.64	38.2	0
2	59	0	2	104.637	131	2	131	20.8325	0	0	0	0	0	0	0	4.51	4.09	280	27	28	5.1	70	7.14	142.6	3.85	41.8	0
3	71	1	2	97.313	255	2	201	22.1367	0	0	0	0	0	1	0	3.29	3.94	161	18	20	6.09	58	5.37	143.5	3.9	39	0
2	63	0	2	111.979	107	3	53	17.9089	0	0	0	0	0	1	0	4.61	3.95	196	8	12	4.84	39	5.67	141.3	4.01	39.7	0
7	72	0	2	99.641	362	3	102	20.8117	0	0	0	0	0	0	0	5.62	4.03	180	8	19	4.77	70	4.67	144.1	4.21	41.1	1
7	81	1	2	115.301	276	3	97	19.3337	1	0	1	0	0	1	1	2.79	4.16	161	17	34	4.27	73	10.63	140.1	4.1	43.1	0
6	36	0	2	89.979	69	2	32	28.578	0	0	0	0	0	0	0	6.53	4.35	325	15	20	4.71	42	5.05	140.4	4.17	42.3	0
3	47	1	3	103.321	255	3	210	23.5294	0	0	0	0	1	0	0	4.07	4.3	174	22	27	5.23	42.5	4.73	141.3	3.75	42.5	1
3	69	0	2	95.647	132	2	88	25.2174	0	0	0	0	0	0	0	5.61	4.39	220	15	18	4.7	49	6.42	140.4	4.19	42.3	0
3	75	1	2	91.311	155	2	77	20.7612	1	0	0	0	0	1	0	10.35	4.12	268	8	16	6.24	61	8.14	140.2	3.91	34.3	0
1	69	1	2	105.637	173	3	118	18.3655	1	0	0	0	0	0	0	6.14	3.69	148	6	17	5.3	61	9.72	148.4	3.7	33.9	0
7	63	1	2	108.974	320	2	120	27.2817	0	0	0	0	0	1	0	4.45	4.89	177	27	21	5.37	58	6.06	142.7	3.74	34.4	1
3	51	0	2	112.304	260	3	232	29.2421	0	1	0	0	0	0	0	5.94	4.04	200	20	17	6.25	42	7.14	140.3	3.84	42.1	0
2	69	0	2	88.308	196	2	154	23.7253	0	1	0	0	0	0	0	5.57	2.7	98	19	15	10.08	71	24.41	135	3.4	34.7	0
7	49	1	2	98.315	274	3	92	17.6708	0	0	0	0	0	0	0	5.9	4.3	228	26	28	4.33	69	5.66	139.4	4.16	40.6	0
2	76	0	2	121.974	41	2	13	16.9597	0	0	0	0	0	0	0	5.55	4.34	218	16	28	4.64	49	8.06	141.9	4.55	42.6	0
3	66	1	2	100.312	173	2	109	20.5693	0	0	0	0	0	0	0	6.25	4.75	194	37	31	5.18	58	6.42	139.2	4.07	41.3	0
7	72	1	2	105.644	159	1	83	24.977	0	0	0	0	0	0	0	7.12	4.93	183	44	33	4.64	90	4.7	147	4.38	43.8	0
3	76	1	2	100.651	225	2	182	22.3081	1	0	0	0	0	1	0	2.92	2.89	90	7	15	4.75	60	6.28	145.1	4.01	36.3	0
3	65	0	2	93.32	298	2	216	25.6369	0	0	0	0	0	0	0	3.05	4.21	129	15	26	4.89	48	3.98	142.7	4.04	44	1
7	66	1	2	109.643	309	2	155	19.9184	1	0	0	0	0	0	0	3.45	4.06	141	8	20	4.96	59	8.03	140.9	3.69	37.9	1
7	51	1	2	91.645	380	3	128	28.125	0	0	0	0	0	1	1	7.78	0.42	177	13	19	4.73	77	4.6	140.3	4.28	41.5	0
3	65	0	2	103.308	138	2	78	24.7676	1	0	0	1	0	0	0	4.73	4.39	170	14	15	5.03	47	5.26	142.7	4.13	42.3	1
3	64	1	2	127.988	210	2	167	21.8724	0	0	0	0	0	0	0	4.16	4.05	113	31	33	4.56	58	9.73	143.3	4.04	33.6	0
3	65	1	2	107.31	137	2	88	22.4813	0	0	0	0	0	0	0	7.88	5.4	431	12	22	5	45	3.4	141.8	3.9	33	0
3	69	1	2	119.312	165	2	140	32.2831	1	0	0	0	0	0	0	6.3	4.77	194	38	24	7.02	62	3.92	140.4	4.19	45.6	0
2	73	0	2	112.969	200	2	104	20.3125	1	0	0	0	0	0	0	8.23	4.11	216	11	19	5.5	49	5.66	140	3.73	37.7	0
3	51	0	2	87.979	286	2	226	29.0006	0	0	0	0	0	0	0	8.58	4.64	323	23	17	5.63	58	5.49	143.8	4.17	44.7	0
3	67	0	2	121.631	90	2	60	23.0112	0	0	0	0	0	0	0	6.86	4.35	271	24	27	5.45	42	5.31	141	4.02	41	0
3	73	0	2	111.983	170	2	123	22.8889	0	0	0	0	0	0	0	3.48	3.72	203	10	21	5.07	44	6.91	141.2	3.99	38.3	0
3	48	0	2	121.981	100	2	51	27.6888	0	0	0	0	0	0	0	8.28	3.76	237	34	32	5.75	42	3.14	141.2	4.02	41.4	0
7	64	1	2	94.984	359	3	202	19.721	0	0	0	0	0	0	0	5.11	4.45	269	17	28	4.68	61	5.41	141.2	4.4	39.4	0
6	74	0	2	71.986	109	3	55	22.7694	0	0	0	0	0	0	0	4.33	4.2	129	7	14	5.27	44	3.65	146.4	3.65	41.8	0
3	55	1	2	113.976	306	2	205	20.9042	0	0	0	0	0	1	0	6.58	4.18	261	25	21	5	65	5.98	147.7	5.98	33.7	0
2	32	1	2	102.972	79	2	62	19.1358	0	0	0	0	0	1	0	6.06	4.54	244	16	15	5.07	77	5.41	139.4	4.59	44.3	0
7	67	1	2	94.981	344	3	214	19.7711	0	0	0	0	0	0	0	7.64	4.53	148	11	16	4.66	58	6.1	142.1	3.66	35.9	0
2	56	1	2	121.635	55	2	21	25.9701	0	0	0	0	0	0	0	6.84	4.15	201	14	19	6.76	69	4.59	142.6	3.75	38.1	0
3	62	1	2	109.308	143	2	108	27.6817	1	0	0	0	0	1	0	6.69	4.8	285	21	30	5.22	61	6.16	142.9	3.98	42.5	0
7	57	1	2	121.315	410	2	150	22.5069	0	0	0	0	1	0	0	5.91	3.29	439	6	15	5.08	41	3.96	141.7	4.55	35.3	1
1	57	1	3	116.641	90	2	65	22.46	1	0	0	0	1	0	0	5.44	4.15	192	13	19	4.55	62	5.18	144.1	4.13	36.2	0
2	43	0	2	83.653	97	2	98	18.8189	0	0	0	0	0	0	0	5.96	3.92	237	15	18	4.74	51	4.15	139	4.15	39.9	0
5	29	1	2	97.317	70	2	51	16.955	0	0	0	0	0	0	0	6.84	4.83	206	12	17	5.56	61	4.55	139.3	3.87	40.8	0
2	62	0	2	114.969	143	2	110	23.3091	1	0	0	0	0	0	0	4.19	4.51	213	45	24	4.81	67	3.5	139.2	4.42	39.4	0
2	46	1	2	134.316	115	2	68	26.3656	1	0	0	0	0	1	0	6.92	4.86	299	24	19	4.49	59	4.11	139.1	4.22	37.7	0
3	59	0	3	77.985	199	3	130	24.2424	0	0	0	0	1	0	0	9.29	4.61	205	27	21	4.8	65	7.81	141.7	4.33	40.8	1
1	21	1	2	96.639	60	2	33	16.0005	0	0	0	0	0	0	0	5.05	4.81	184	10	17	3.92	60	3.92	141.5	4.11	43.8	0
3	68	0	2	128.302	183	2	163	21.875	0	0	0	0	0	0	0	4.43	3.89	176	11	17	4.83	53	4.77	144.9	3.78	38.2	0
1	61	1	2	101.298	69	2	35	19.5918	0	0	0	0	0	0	0	5.04	3.91	207	35	48	4.58	60	5.23	146.9	3.51	30.7	0
3	50	0	2	89.648	91	2	75	25.2994	0	0	0	0	0	0	0	4.44	4.29	253	17	11	5.38	67	4.43	144.5	3.92	40.7	0
3	48	1	2	91.316	196	2	122	30.1896	0	0	0	0	0	0	0	9.51	3.74	456	40	29	7.54	43	2.99	139.2	3.79	30.8	0
5	24	1	2	89.976	121	2	74	23.3747	0	0	0	0	0	0	0	6.31	5.08	230	29	16	9.2	84	3.99	140.9	5	48	0
7	71	1	2	102.978	236	3	84	19.721	0	0	0	0	1	1	0	6.1	4.25	188	13	23	4.55	60	8.48	140.5	4.6	37.6	1
7	73	1	3	79.31	333	3	125	22.4059	0	1	0	1	1	0	0	7.43	4.18	136	19	14	5.56	66	6.57	145.8	3.63	38.3	1
7	70	1	3	105.307	371	2	204	24.4646	0	0	0	1	0	0	0	6.5	3.73	239	8	16	5.58	64	5.96	140.6	3.96	36.1	0
7	70	1	2	98.983	332	3	188	24.281	0	0	0	0	0	1	0	9.04	4.35	323	29	21	5.41	73	5.5	137	4.07	35	1
2	53	0	2	103.316	154	2	123	18.8189	0	0	0	0	0	0	0	3.46	3.73	139	13	19	4.88	56	4.58	143.2	3.69	42.5	0
2	51	1	3	105.63	146	2	88	23.0518	0	0	0	0	1	1	0	4.6	5.29	147	19	18	4.98	50	6.63	144.5	3.88	39.9	0
3	71	1	3	103.973	163	3	119	23.2438	0	0	0	0	1	0	0	4.09	4.16	140	16	26	5.84	72	7.58	142.9	4.62	44.4	0
0	31	1	2	89.648	59	4	0	25.4694	0	0	0	0	0	0	0	10.59	5.45	277	37	26	5.07	71	6.74	142	4.01	51.2	0
3	46	0	2	85.98	215	2	200	22.9481	0	0	0	0	0	0	0	4.64	3.65	199	11	12	5.14	37	5.14	141.9	3.75	36.5	0
0	15	0	2	95.982	29	4	0	21.6713	0	0	0	0	0	0	0	8.45	4.53	247	11	22	4.81	57	5.24	136.9	4.12	44.2	0
6	40	1	2	88.32	48	1	36	21.83	0	0	0	0	0	1	0	7.08	5.06	216	69	32	4.73	61	7.67	145.2	4.1	49.9	0
0	40	1	2	91.321	68	1	50	20.5151	0	0	0	0	0	0	0	6.28	4.9	220	24	19	4.76	61	3.8	145.9	3.66	41.4	0
1	63	1	2	119.957	153	3	102	15.6226	1	0	0	0	0	0	0	4.79	4.75	159	25	19	4.3	71	9.82	146.3	3.77	38.4	0
2	48	1	2	95.988	117	2	96	21.2585	0	0	0	0	0	1	0	6.13	4.89	164	19	22	5.63	56	4.59	144.4	4.27	42.7	1
2	54	1	2	95.987	61	2	35	23.04	0	0	0	0	0	0	0	5.8	4.35	169	33	24	4.89	76	5.71	143.6	4.41	35.8	0
7	69	1	2	111.643	345	3	113	23.5078	0	0	0	0	0	1	0	7.38	3.66	289	13	16	5.09	56	3.96	141.5	4.38	36.9	1
3	49	1	2	118.647	123	2	65	18.7328	0	0	1	0	0	0	1	2.84	3.03	101	20	35	4.58	35	2.6	140.9	2.94	36.3	1
7	76	0	2	113.315	375	3	132	27.5802	0	0	0	0	0	0	0	6.51	3.83	246	12	15	7.49	31	4.15	141.5	3.6	36.2	0
8	30	1	2	97.983	125	2	119	21.1463	0	0	0	0	0	0	0	5.48	4.97	226	21	15	4.65	68	6	139.5	4.72	39	0
1	24	1	2	89.653	54	3	58	17.1753	0	0	0	0	0	0	0	3.68	4.5	189	21	19	5.79	70	3.47	139.7	3.84	40.2	0
3	47	1	2	115.652	114	2	88	22.5981	0	0	0	1	0	0	1	8.56	4.2	195	36	17	4.66	92	4.25	140.1	4.17	38.3	0
3	55	0	2	107.317	120	2	82	22.2656	0	0	0	0	0	0	0	5.26	4.38	257	20	17	5.22	62	4.7	143.1	3.99	39.5	0
2	37	1	2	75.984	67	2	31	22.6474	0	0	0	0	0	0	0	4.69	5.22	162	20	20	5.09	57	5.65	139.9	3.99	40.1	0
7	47	1	2	87.655	246	3	82	19.7133	0	0	0	0	0	0	0	9.3	4.06	253	20	17	4.72	38	4.94	139.4	4.42	40.4	0
2	56	0	2	120.638	120	2	105	19.8141	0	0	0	0	0	0	0	4.61	4.32	165	20	22	4.07	49	6.19	140.2	4.05	41.9	0
7	86	1	2	90.975	429	3	175	24.3865	0	0	0	0	0	0	0	10.68	4.45	299	16	20	4.73	64	6.37	140.2	4.37	42.2	1
7	64	0	2	102.313	302	3	95	21.6311	1	0	0	0	0	0	0	4.85	4.16	292	10	12	4.76	42	3.97	141.9	3.9	40.7	1
7	72	1	3	104.98	335	3	140	17.9688	0	0	0	0	0	0	1	4.8	3.95	187	14	19	3.84	53	6.55	136.5	4.44	37.5	1
3	71	0	2	99.314	166	2	135	21.4903	1	1	1	0	0	0	0	6.34	4.24	380	7	12	5.67	94	8.14	141.6	4.4	39.1	0
7	65	1	3	107.98	298	2	63	20.4444	0	0	0	1	0	0	0	6.22	3.33	165	10	15	4.89	68	4.11	141.8	4.2	36.6	0
7	62	1	2	115.641	335	3	98	21.0077	1	0	0	0	0	0	0	6.83	5.24	155	18	19	3.91	66	4.13	142.1	4.03	44.4	0
2	67	1	2	112.979	103	2	48	24.2424	0	0	0	0	0	0	0	7.07	4.28	181	10	20	5.14	76	5.76	135.9	5.76	41.8	0
2	22	1	2	90.655	47	2	34	22.231	0	0	0	0	0	0	0	7.08	4.89	284	12	18	5.13	57	2.92	139.5	4.89	45.5	0
7	67	1	2	112.985	282	3	155	22.4913	0	0	0	0	0	1	0	4.51	4.26	173	17	23	4.67	82	3.24	138.9	4.12	36.4	1
7	75	1	2	116.966	355	2	133	25.7117	1	0	0	0	0	0	0	4.51	4.26	173	17	23	4.67	82	3.24	138.9	4.12	36.4	1
3	76	0	4	104.644	275	2	204	29.3333	1	1	1	1	0	0	0	4.21	3.29	130	9	14	8.63	81	6.52	141.8	4.02	37.5	1
2	58	0	2	112.316	47	2	26	19.1406	0	0	0	0	0	0	0	8.05	4.69	221	11	15	6.443	48	7.5	143.3	3.75	42.2	0
7	61	1	2	87.318	359	3	184	17.7154	0	0	0	0	0	0	0	4.83	3.85	215	23	31	5	67	6.8	129.6	5.62	34.5	0
1	45	0	2	108.974	70	2	52	25.2363	0	0	0	0	0	0	0	7.95	5.07	194	21	20	6.44	47	4.41	141.3	4.2	44.6	0
1	25	1	2	94.985	76	2	50	21.551	0	0	0	0	0	0	0	10.74	4.52	233	43	25	5.11	73	5.17	141	3.89	42.4	0
8	30	1	2	96.643	74	3	45	20.1771	0	0	0	0	0	1	1	4.41	4.47	374	169	121	4.85	58	3.16	141.4	5.13	39.6	0
7	73	1	2	89.991	310	1	137	20.1951	0	0	0	0	0	0	0	5.5	4.24	202	9	16	6.62	56	5.85	141.8	4.72	38.4	1
1	53	0	2	103.653	90	2	82	20.7612	0	0	0	0	0	0	0	4	4.38	168	13	16	4.79	48	4.69	142.8	4.11	40.1	0
3	65	0	2	109.307	215	2	190	24.4444	0	0	0	0	0	0	0	5.19	3.97	240	8	13	6.04	42	3.77	141.7	4.24	40.2	1
3	66	1	2	96.653	126	3	100	24.9135	0	0	0	0	0	1	1	5.35	4.28	178	24	15	4.76	67	5.22	140.9	4.27	39.1	0
0	38	0	2	90.319	23	4	0	21.3039	0	0	0	0	0	0	0	5.34	3.67	182	11	16	4.88	43	4.94	138.5	3.61	37.9	0
7	53	0	2	96.646	183	2	29.2	20.8117	0	0	0	0	0	0	0	4.01	3.7	123	14	22	5.13	42	5.63	140.4	3.97	35.9	0
3	79	1	3	108.31	152	3	101	23.5615	1	0	1	0	0	0	0	4.79	4.54	93	30	30	5.75	52	4.71	140	3.81	39.5	1
3	50	0	2	97.649	142	2	102	20.202	1	0	0	0	0	0	0	3.76	4.27	242	13	20	4.49	44	4	140.5	4.6	39.7	0
3	68	1	2	91.981	270	2	238	24.4646	1	0	0	0	0	0	0	9.7	3.83	389	16	13	6.35	63	5.13	132	4.1	29.7	0
6	51	0	2	88.98	75	2	51	18.8271	0	0	0	0	0	0	0	7.48	4.33	325	14	25	6	36	2.73	140.2	4.09	33.1	0
2	51	0	2	88.315	148	2	100	22.5895	0	0	0	0	0	0	0	3.45	4.79	101	10	19	5.03	57	5.92	143.6	4.17	44.2	0
7	69	1	2	90.987	487	3	174	26.5338	0	0	0	0	0	1	1	7.2	3.31	188	17	26	4.91	70	5.76	140.7	3.92	31.8	0
2	56	1	2	84.985	59	2	31	23.6244	0	0	0	0	0	0	0	5	4.59	235	33	24	5.55	77	5.87	142.4	4.51	43.8	0
7	76	1	2	105.636	343	3	128	21.0938	0	0	0	0	0	0	1	4.83	4.34	222	9	16	5.05	66	5.2	143.2	4.11	37.3	1
3	66	1	2	120.644	177	2	156	24.8016	0	0	0	0	0	0	0	5.18	4.73	171	13	14	5	62	6.12	142.8	4.31	38.6	0
2	49	1	2	89.649	70	2	40	21.3859	0	0	0	0	0	1	1	4.97	5.06	202	9	20	5.18	73	6.24	139.4	4.49	43	0
3	53	0	2	105.976	132	2	114	22.2222	0	0	0	0	0	0	0	4.59	4.4	154	9	15	5.32	40	3.89	140.2	3.89	41	0
7	55	0	2	117.315	283	3	89	24.0238	0	0	0	0	0	0	0	6.85	3.43	278	5	10	5.51	46	4.18	142.6	4.18	33.8	0
6	39	0	2	87.651	200	3	151	24.2188	0	0	0	0	0	0	0	4.88	3.94	234	8	14	4.8	49	4.27	142	3.92	40.8	0
3	59	1	2	113.65	220	2	194	23.1837	0	0	0	0	0	1	1	6.9	4.49	219	23	18	7.29	52	3.91	141.6	3.37	41.5	0
2	55	1	2	107.984	110	2	92	25.6055	0	0	0	0	0	0	0	5.8	5.01	153	22	18	5.62	61	3.7	140.6	4.49	39.4	0
7	62	1	2	86.652	330	3	140	17.3061	0	0	0	0	0	0	0	5.43	3.92	138	8	18	6.47	59	6.1	141.3	4.79	37.1	0
7	71	1	3	118.644	374	2	138	23.4375	0	0	0	1	0	1	1	7.41	4.36	144	14	20	4.46	64	7.66	139.8	4.03	38	0
2	51	1	2	118.32	55	2	22	25.2092	0	0	0	0	0	0	0	7.32	4.71	134	13	16	5.4	76	6.96	142.9	4.53	40.2	0
7	64	1	2	100.648	390	3	157	21.9525	0	0	0	0	0	0	0	5.57	4.54	211	23	19	5.41	52	6.81	139.9	4.38	37.2	0
2	46	0	2	81.982	85	3	68	25.7812	0	0	0	0	0	0	0	7.12	4.43	178	11	16	5.24	52	4.52	138.8	3.5	41.1	0
2	40	0	2	84.985	38	2	26	24.6094	0	0	0	0	0	0	0	8.79	3.64	169	17	21	5.24	53	4.65	137.7	3.82	36	0
3	67	1	2	115.976	110	2	94	24.977	0	0	0	0	0	0	0	3.67	1.55	189	136	69	4.81	50	5.17	139.8	4.32	38.2	0
2	57	1	2	111.644	135	2	78	27.6095	0	0	0	0	0	0	0	4.28	4.24	122	48	31	5.55	85	5.03	142.6	3.77	42.9	0
2	62	1	2	82.321	141	2	120	16.6525	0	0	0	0	0	1	0	5.52	5.27	57	10	14	5.16	71	6.13	141.9	4.35	42.3	0
2	47	0	2	101.643	84	2	68	23.3091	1	0	0	0	0	0	0	4.58	3.74	280	21	13	5.83	61	3.77	141.6	4.43	37	0
2	77	1	2	90.308	93	3	76	18.369	0	0	0	0	0	0	0	5.96	3.44	79	11	19	5.11	81	7.79	143.2	4.01	37.2	0
1	20	1	2	102.312	35	2	11	19.1358	0	0	0	0	0	0	0	12.08	5.15	198	122	75	7.7	60	3.62	137.9	4.55	45.9	0
0	20	1	2	96.315	44	4	0	20.7612	0	0	0	0	0	0	0	4.2	4.58	205	27	18	4.57	59	4.5	141	3.84	43.9	0
2	45	0	2	101.65	70	2	52	22.6562	0	0	0	0	0	0	0	5.3	3.9	125	66	51	5.27	52	6.06	142.9	4.04	44.1	0
6	49	1	2	89.985	45	3	48	31.378	0	0	0	0	0	0	0	6.82	4.85	322	30	20	8.01	71	5.03	139.1	4.55	42.3	0
1	43	0	2	88.651	30	2	10	23.3091	0	0	0	0	0	0	0	4.49	3.83	281	15	19	4.91	46	6.07	138.4	4.12	39.2	0
2	56	1	3	110.311	108	2	58	26.449	1	1	0	0	0	1	0	7.56	5.09	166	24	22	13.36	62	10.21	136.3	3.74	43.1	0
7	64	1	2	108.305	435	3	157	22.4059	0	0	0	0	0	0	0	4.19	3.65	153	13	22	4.97	65	4.59	142.5	4.45	43.2	0
3	49	0	3	138.983	204	2	173	24.7475	1	0	0	0	0	0	0	7.66	4.79	263	17	15	5.38	36	4.47	137.3	4.38	39.8	0
2	64	1	2	82.978	39	2	13	21.3839	0	0	0	0	0	0	0	4.35	4.14	184	22	27	4.84	51	5.64	140.5	4.18	40.6	0
3	64	0	2	102.317	180	2	142	25.1039	0	0	0	0	0	1	0	6.5	4.98	230	11	15	5	42	4.16	139.4	4.61	39.1	0
7	76	1	2	97.639	345	3	171	19.1953	0	0	0	0	0	1	0	4.03	3.82	179	9	21	4.8	68	4.99	140.8	4.9	37.9	0
3	69	0	2	108.968	123	2	65	22.8928	1	0	0	0	0	0	0	8.63	3.86	207	11	18	5	57	6.82	142.4	3.47	40.6	0
6	77	1	3	96.64	95	1	30	27.3588	0	1	1	0	0	0	0	4.46	4.4	198	21	22	12.12	73	4.38	145.1	3.43	37.1	0
3	67	1	2	86.646	221	2	152	27.6817	0	0	0	0	0	1	0	7.24	4.65	178	19	20	5.49	63	5.49	143.6	3.98	38.8	0
8	71	1	2	93.31	150	2	82	21.4536	0	0	0	0	1	0	0	4.49	3.92	72	26	18	5.19	45	4.42	139.1	3.86	33.1	0
7	64	0	2	112.978	368	3	110	24.0484	0	0	0	0	0	0	0	3.24	3.88	232	12	25	5.49	86	7.55	141.1	4.11	46.2	0
1	28	1	2	85.974	61	4	20	18.5185	0	0	0	0	0	0	0	7.69	4.15	160	12	17	5.08	67	4.82	143.2	3.85	41.6	0
7	75	1	2	61.652	215	3	167	25.6173	0	0	0	0	0	1	1	3.21	4.01	118	11	20	4.96	60	5.02	143	3.85	38	1
1	64	1	3	86.31	124	2	73	21.2953	0	0	0	1	0	0	0	4.05	4.12	202	12	18	4.9	73	6.96	142.5	3.5	41.1	1
3	68	1	2	133.307	190	2	141	21.6713	1	0	0	0	0	1	0	6.24	4.85	169	13	18	5.13	65	5.49	141.6	3.83	40.7	0
3	74	0	2	112.637	286	2	213	23.1111	1	0	0	0	0	0	0	5.76	3.82	230	11	13	4.69	73	4.53	143.3	4.76	36.9	0
7	66	1	2	124.304	420	3	134	18.8272	1	0	0	0	0	0	0	4.38	3.85	264	13	22	4.54	67	5	145.7	4.32	34.8	0
1	63	1	2	109.307	175	2	149	20.7612	0	0	0	1	0	0	0	5.14	4.78	225	23	19	5.07	61	4.95	143.2	4.09	39.3	0
3	71	0	3	94.639	265	2	207	26.6389	1	0	0	1	0	0	0	4.95	4.69	240	15	14	5.91	114	7	147	4.57	39.2	0
6	53	1	2	89.649	136	2	81	26.449	0	0	0	0	0	0	0	6.21	4.66	210	18	20	5.2	122	6.2	143	4.46	41.5	0
2	68	1	2	102.316	148	2	100	21.9671	0	0	0	0	0	0	0	5.22	4.4	141	26	24	8.9	64	4.85	145.4	3.6	41.1	0
2	59	0	2	100.314	86	3	60	32.05	0	0	0	0	0	0	0	3.44	4.23	167	24	21	5.5	44	3.75	143	3.53	38.4	0
3	66	1	2	123.975	151	2	100	17.301	0	0	0	0	0	0	0	4.21	4.51	201	10	23	4.63	54	3.93	136.7	4.47	31.7	0
3	63	1	2	112.65	153	2	105	20.7612	0	0	0	1	0	0	0	5.33	4.78	187	27	20	5.61	50	5	137.4	4.4	38.2	0
3	30	1	2	75.316	84	2	57	19.8347	0	0	0	0	0	0	0	5.1	4.59	182	21	22	4.55	57	4.05	139.4	3.54	40.2	0
3	56	1	2	69.989	186	2	140	23.1834	0	0	0	0	0	1	1	7.39	4.32	339	53	19	6.23	58	6.94	139.2	3.8	34.6	0
3	76	0	2	114.642	274	2	230	24.974	1	0	0	0	0	0	0	2.72	3.34	130	13	27	4.68	69	6.9	143.2	3.8	36.2	0
2	56	0	2	89.645	128	3	80	26.6389	0	0	0	0	1	0	0	6.57	4.74	225	14	18	5.2	56	5.14	143.5	4.14	40.7	0
3	68	0	2	105.972	204	2	154	21.6413	0	0	0	0	0	0	0	5.67	4.47	256	10	19	5.04	39	3.41	143.7	4.58	42.4	0
4	63	0	2	107.639	325	2	234	29.2969	1	0	0	0	0	0	0	6.56	3.86	273	21	20	5.63	49	6.8	142.3	3.86	37.1	0
3	78	1	2	101.294	145	2	62	23.5883	1	0	0	0	0	0	0	6.74	4.34	124	23	22	5.56	68	4.85	141	4.27	40.4	0
3	51	0	2	101.311	104	2	63	22.0604	0	0	0	0	1	1	0	3.72	4.19	176	14	23	5.25	46	5.62	144.5	3.84	36.6	0
2	57	1	2	94.644	138	2	98	22.0386	0	0	0	0	0	0	0	4.81	4.97	170	18	15	5.73	59	6.74	142.8	3.69	35.8	0
3	62	1	2	99.981	282	2	196	23.1837	0	0	0	0	0	0	0	7.35	4.34	225	29	18	4.97	73	6.06	141.9	4.29	36.8	0
2	69	0	2	119.971	276	2	211	25.7117	1	0	0	0	0	0	0	6.03	4.03	206	12	11	4.9	79	5.29	143.9	3.94	35.3	0
5	18	1	2	90.315	111	2	92	17.9151	0	0	0	0	0	0	0	5.21	4.97	149	9	22	5	110	4.03	139.9	4.57	46.5	0
2	55	0	2	95.981	135	2	95	23.3844	1	0	0	0	0	0	0	5.81	4.72	170	10	20	5.73	95	6.69	142.3	4.58	45.8	0
3	64	1	2	88.646	206	2	149	21.7181	0	0	0	0	0	0	0	7.89	4.06	258	21	23	5.26	57	6.4	144.4	4.3	35.3	0
3	41	0	2	82.321	98	2	83	20.202	0	0	0	0	0	0	0	6.12	4.29	244	9	16	5.12	48	4.34	137.6	4.32	38.9	0
3	73	1	2	116.975	267	2	197	24.7676	0	0	0	0	0	1	0	7.49	4.96	312	18	27	5	52	7.17	140.9	4.42	37.3	0
1	41	1	2	108.309	119	2	82	23.0546	0	0	0	0	0	0	0	7.85	4.49	243	35	18	5.26	69	4.44	140.6	4.72	39.4	0
3	41	1	2	110.649	143	2	114	24.0569	1	0	0	0	0	1	0	4.47	4.71	184	30	21	5.02	70	6.21	139.8	4.11	38.8	0
3	53	0	2	104.649	103	2	77	18.026	0	0	0	0	0	0	0	4.72	3.92	149	12	18	5.16	37	4.8	141.9	3.85	37	0

## Sheet: Sheet1
0308051	郑彦林	71	0	0	2	20190307	148/78	26	289	3	230	1000	500	500	0	0					左经胸喷门癌切除术
0367460	蔡兰青	66	1	0	2	20190308	126/70	28.6	305	3	85	1500	300	500	0	0					腹腔镜食管癌根治术
0366436	丁后龙	54	1	0	2	20190311	119/78	27.9	248	3	174	1200	500	300	0	0					食管癌根治术
0367629	周国保	72	1	0	2	20190311	147/62		180	3	130			400	0	0					食管癌根治术
0366822	周具英	84	0	0	3	20190313	113/66		137	3	83	900	400	200	0	0	ICU				食管癌根治术
0368260	任永华	77	1	0	2	20190314	145/80	27.8	385	2	175	1400	500	500	0	0					食管癌根治术
0368889	魏永科	55	1	0	2	20190315	113/69		364	3	170	1000	800	500	0	0					食管癌根治术
